1 **Sex chromosome dosage compensation in *Heliconius***  
2 **butterflies: global yet still incomplete?**

3  
4

5 James R. Walters<sup>1\*</sup>, Thomas J. Hardcastle<sup>2</sup>, and Chris D. Jiggins<sup>3</sup>

6

7 1) Department of Ecology and Evolutionary Biology, University of Kansas, Lawrence, KS,  
8 USA

9 2) Department of Plant Biology, University of Cambridge, Cambridge, UK

10 3) Department of Zoology, University of Cambridge, Cambridge, UK

11

12

13 \*Author for correspondence: James R Walters, Department of Ecology and Evolutionary  
14 Biology, University of Kansas, Lawrence, KS, USA

15 phone: 785-864-6341

16 email: jrwalters@ku.edu

17

18

## 19 Abstract

20 The evolution of heterogametic sex chromosome is often – but not always – accompanied  
21 by the evolution of dosage compensating mechanisms that mitigate the impact of sex-  
22 specific gene dosage on levels of gene expression. One emerging view of this process is that  
23 such mechanisms may only evolve in male-heterogametic (XY) species but not in female-  
24 heterogametic (ZW) species, which will consequently exhibit “incomplete” sex  
25 chromosome dosage compensation. However, recent results suggest that at least some  
26 Lepidoptera (moths and butterflies) may prove to be an exception to this prediction.  
27 Studies in bombycoid moths indicate the presence of a chromosome-wide epigenetic  
28 mechanism that effectively balances Z chromosome gene expression between the sexes by  
29 reducing Z-linked expression in males. In contrast, strong sex chromosome dosage effects  
30 without any reduction in male Z-linked expression were previously reported in a pyralid  
31 moth, suggesting a lack of any such dosage compensating mechanism. Here we report an  
32 analysis of sex chromosome dosage compensation in *Heliconius* butterflies, sampling  
33 multiple individuals for several different adult tissues (head, abdomen, leg, mouth, and  
34 antennae). Methodologically, we introduce a novel application of linear mixed-effects  
35 models to assess dosage compensation, offering a unified statistical framework that can  
36 estimate effects specific to chromosome, to sex, and their interactions (*i.e.*, a dosage effect).  
37 Our results show substantially reduced Z-linked expression relative to autosomes in both  
38 sexes, as previously observed in bombycoid moths. This observation is consistent with an  
39 increasing body of evidence that some lepidopteran species possess an epigenetic dosage  
40 compensating mechanism that reduces Z chromosome expression in males to levels  
41 comparable with females. However, this mechanism appears to be imperfect in *Heliconius*,  
42 resulting in a modest dosage effect that produces an average 5-20% increase in male  
43 expression relative to females on the Z chromosome, depending on the tissue. Thus our  
44 results in *Heliconius* reflect a mixture of previous patterns reported for Lepidoptera. In  
45 *Heliconius*, a moderate pattern of “incomplete” dosage compensation persists apparently  
46 despite the presence of an epigenetic dosage compensating mechanism. The chromosomal  
47 distributions of sex-biased genes show an excess of male-biased and a dearth of female-  
48 biased genes on the Z chromosome relative to autosomes, consistent with predictions of  
49 sexually antagonistic evolution.

50

51

## 52 Introduction:

53

54 Dosage compensation is a gene-regulatory mechanism that equalizes levels of gene  
55 expression in response to differences in gene dose (i.e. copy number). Without dosage  
56 compensation, changes in gene dose can substantially affect gene expression, potentially  
57 resulting in detrimental effects on finely-tuned gene networks (Birchler et al. 2001). For  
58 this reason, it was long assumed that the evolution of a chromosome-wide dosage  
59 compensating mechanism was an essential step in the evolution of heteromorphic sex  
60 chromosomes (Vicoso & Bachtrog 2009; Disteche 2012; Mank 2013).

61 Heteromorphic sex chromosomes typically evolve from homologous autosomes that  
62 acquire a sex-determining locus, accumulate sexually-antagonistic alleles, and suppress  
63 recombination (B Charlesworth 1996; B Charlesworth & D Charlesworth 2000; Bachtrog  
64 2006). Eventually, substantial gene loss and degeneration occurs on the nascent Y  
65 chromosome (or W in female-heterogametic ZW taxa) (Rice 1984; B Charlesworth & D  
66 Charlesworth 2000; Bachtrog 2013). The erosion of genes from the Y/W presents the  
67 problem of balancing gene expression with the autosomes. Monosomy of the X/Z in one sex  
68 means the dose (i.e., copy number) of most sex-linked genes differs by half between the  
69 sexes. If the resulting sex-linked gene expression becomes similarly unbalanced,  
70 degradation of the Y/W could impose a substantial fitness cost for the heterogametic sex  
71 due to impaired dosage-sensitive interactions with autosomal loci (Ohno 1967; Mank 2009;  
72 Pessia et al. 2013). It is thus predicted that a global dosage-compensating mechanism  
73 should evolve to balance the expression of X/Z loci relative to autosomes as the Y/W  
74 degrades (Ohno 1967; Brian Charlesworth 1978; Mank 2013; Veitia et al. 2015). This  
75 process should also result, indirectly, in balanced gene expression between the sexes for  
76 the X/Z. One important working assumption in this framework is that average expression  
77 is approximately equal across autosomes, therefore *complete* dosage compensation should  
78 yield X:A (or Z:A) expression ratios of  $\sim 1$  in both sexes (Mank 2009; 2013; Nguyen &  
79 Disteche 2006; Vicoso & Bachtrog 2011b; Smith et al. 2014; Walters & Hardcastle 2011).

80 Efforts to evaluate this hypothesis have expanded greatly in the last decade with the  
81 application of genome-wide expression analyses via microarray or RNA-seq, and have  
82 yielded several unexpected results. The history and contemporary findings of research on  
83 sex chromosome dosage compensation are extensively reviewed in several recent  
84 publications (Disteche 2012; Mank 2013; Pessia et al. 2013; Ferrari et al. 2014). Here we  
85 briefly highlight details particularly relevant to our current results. Where investigated  
86 during the pre-genomic decades, the limited results obtained tended to support theoretical  
87 predictions. Initial genome-wide investigations using microarrays in established model  
88 organisms such as mouse, humans, fruit flies, and nematodes – all male heterogametic  
89 species – yielded patterns consistent with global sex chromosome dosage compensation.  
90 As predicted, average expression on the X was comparable to autosomes (X:A  $\sim 1$ ) in both

91 sexes and the canonical view of dosage compensation and sex chromosome evolution  
92 appeared robust (Hamada 2005; Gupta et al. 2006; Nguyen & Disteché 2006). Moreover,  
93 the recognition that distinct molecular mechanism underlay dosage compensation in flies,  
94 worms, and humans added further support to the universality of dosage compensation  
95 evolving concomitantly with differentiated sex chromosomes (Deng et al. 2011; Straub &  
96 Becker 2011). However, more recent research has added substantial complexity and  
97 controversy to the issue. In particular, evaluating dosage compensation in the context of  
98 ancestral expression levels indicates that eutherian mammals should be considered to have  
99 X:A expression ratio of  $\sim 0.5$  in both sexes (Julien et al. 2012; F Lin et al. 2012). Importantly,  
100 in all of these cases, sex-linked expression appears to be balanced between males and  
101 females (male:female  $\sim 1$  on the X) and there is no evidence of a gene dosage-effect on X  
102 chromosome expression.

103 Other striking exceptions to the canonical theory of dosage compensation were  
104 observed when investigations of sex chromosome dosage compensation expanded into  
105 novel taxa. Notably, several female-heterogametic taxa exhibit incomplete dosage  
106 compensation: Male birds, snakes, and schistosomes are homogametic (ZZ) with Z:A  $\sim 1$ ,  
107 but in females the Z:A ratio is significantly less than 1 (Itoh et al. 2007; Vicoso & Bachtrog  
108 2011a; Vicoso, Emerson, et al. 2013a; Mank & Ellegren 2009; Naurin et al. 2011). The  
109 apparently dichotomous pattern of completely dosage compensated XY taxa versus  
110 incompletely compensated ZW species catalyzed strong suggestions and some nascent  
111 theory claiming that global, complete sex chromosome dosage compensation might be  
112 universally absent from ZW taxa and occur only XY species (Bachtrog et al. 2011; Mank  
113 2013; Naurin et al. 2010; Vicoso, Emerson, et al. 2013a). We call this the *heterogametic*  
114 *dichotomy hypothesis*.

115 Despite the emerging evidence supporting the heterogametic dichotomy hypothesis,  
116 there is at least one conspicuous female-heterogametic taxon that may prove to be an  
117 exception: Lepidoptera (moths and butterflies). The status of sex chromosome dosage  
118 compensation in Lepidoptera is currently ambiguous, primarily due to inconsistent results  
119 reported by the few studies currently available. The first genome-wide assessment of sex  
120 chromosome dosage compensation in Lepidoptera was based on a microarray dataset in  
121 the silkworm, *Bombyx mori* (Xia et al. 2007). An initial analysis of these data reported  
122 incomplete dosage compensation similar to other ZW taxa (Zha et al. 2009). However,  
123 analytical flaws were later identified in this initial effort and a subsequent reanalysis  
124 indicated the Z:A ratio was equal in males and females, offering evidence for global,  
125 complete sex chromosome dosage compensation (Walters & Hardcastle 2011).  
126 Intriguingly, this reanalysis further revealed a Z:A ratio of  $\sim 0.7$ , significantly less than one.  
127 This result is not anticipated by current theory concerning sex chromosome evolution.  
128 Additional evidence for complete sex chromosome dosage compensation in Lepidoptera  
129 was more recently reported in another bombycoid moth, *Manduca sexta* (tobacco  
130 hornworm), using RNA-seq (Smith et al. 2014). Again the Z:A ratio was equal between

131 sexes, but in this case the Z:A ratio was only marginally less than 1, with significance  
132 depending on filtering thresholds. In stark contrast to results from Bombycoid moths,  
133 RNA-seq analysis of the Pyralid moth *Plodia interpunctella* (Indian meal moth) showed no  
134 evidence for dosage compensation, with female Z:A~0.5 while male Z:A was ~ 1 (Harrison  
135 et al. 2012). This is the largest magnitude of sex chromosome dosage effect yet reported,  
136 exceeding patterns observed in birds and snakes (Itoh et al. 2007; Vicoso & Bachtrog  
137 2011a; Vicoso, Emerson, et al. 2013a; Mank & Ellegren 2009; Naurin et al. 2011).

138 These studies differed considerably in what tissues or body parts were assayed. The *B.*  
139 *mori* microarray data included samples from 10 different larval body parts (Xia et al. 2007;  
140 Walters & Hardcastle 2011). The *M. sexta* study sampled only adult heads while pools of  
141 whole adult *P. interpunctella* were used (Harrison et al. 2012; Smith et al. 2014). These  
142 latter two studies both constructed *de novo* transcriptome assemblies and assigned  
143 chromosomal linkage based on contig homology to *B. mori*. This approach of assigning Z-  
144 linkage is seemingly robust because synteny is highly conserved in Lepidoptera (Pringle et  
145 al. 2007; Heliconius Genome Consortium 2012; Yue et al. 2013; Ahola et al. 2014).

146 However, only the *B. mori* dataset, which included isolated gonads, provided any  
147 opportunity to assess patterns of dosage compensation separately in somatic and  
148 reproductive tissues. It is well-established that, at least in *B. mori*, the Z chromosome is  
149 enriched for highly-expressed, testes-specific genes but depleted of ovary-specific  
150 transcripts (Arunkumar et al. 2009; Suetsugu et al. 2013). Thus, inclusion of gonadal tissue  
151 may substantially skew patterns of Z:A ratios to appear “uncompensated” even when  
152 somatic Z:A ratios are otherwise comparable between the sexes (Walters & Hardcastle  
153 2011).

154 In this manuscript we report the first genomic analysis of sex chromosome dosage  
155 compensation in a butterfly. Using RNA-seq, we assay male and female gene expression in  
156 several body parts of *Heliconius melpomene* and its closely related sibling species, *H. cydno*  
157 (Martin et al. 2013; Quek et al. 2010). The existence of a complete reference genome and  
158 linkage map for *H. melpomene* facilitates a nuanced inference of chromosome and sex  
159 specific effects on gene expression, which we achieve through the novel application of  
160 mixed-effects linear models to analyze dosage compensation (Heliconius Genome  
161 Consortium 2012). Our results show substantially reduced Z-linked expression relative to  
162 autosomes in both sexes, but also modest dosage effect on the Z chromosome, and thus  
163 reflect a mixture of previous patterns reported for Lepidoptera.

164

## 165 **Methods:**

### 166 **Samples and Sequencing**

167 Two groups of RNA-seq data were used to estimate gene expression. First, we used the  
168 paired-end data sequenced from *H. melpomene* generated by Briscoe et al. (Briscoe et al.  
169 2013) ArrayExpress ID: E-TAB-1500. This data set includes three male and three female  
170 samples from mouth, leg, and antennae. Additionally, we generated new RNA-seq data from  
171 adult head (excluding antennae) and abdomen. For these samples, *Heliconius* butterflies  
172 were reared in large insectaries in Gamboa, Panama. Insectary populations were recently  
173 established from local natural populations. Males and females were kept separate after  
174 eclosion and aged 6 days before collection to allow reproductive tissues to develop  
175 (Dunlap-Pianka et al. 1977); all samples were virgins. Head and abdomen tissues were  
176 collected into RNAlater and stored frozen before RNA purification. Total RNA was  
177 extracted with TRIzol reagent (Invitrogen, Carlsbad, CA), purified using RNeasy columns  
178 (Qiagen, Valencia, CA), and treated with TURBO DNase (Life Technologies, Grand Island,  
179 NY) following manufacturer's instructions. Messenger RNA was isolated from total RNA via  
180 poly-A pulldown and subsequently transformed into a cDNA library using the Illumina  
181 TruSeq sample preparation kits. Paired-end 100 basepair sequencing was performed on an  
182 Illumina HiSeq.

### 183 **Read mapping and normalization**

184 Read mapping and estimation of fragment counts per gene were performed using RSEM  
185 (v1.2.11) running Bowtie2 (v2.1.0) (Li & Dewey 2011; Langmead & Salzberg 2012). Reads  
186 were mapped as paired-end data, with the first 9 bp and the final 40 bp trimmed before  
187 mapping to remove low and variable-quality bases. All subsequent statistical analyses  
188 were performed using R and BioConductor, especially the baySeq package for assessing  
189 differential expression (Hardcastle & Kelly 2010; R Development Core Team 2014). The  
190 library scaling factors were calculated as the sum of non-zero gene expression levels below  
191 the 75<sup>th</sup> percentile of gene expression, following the example of Hardcastle et al. (2012) as  
192 an amendment to Bullard *et al.* (2010). As there is potential for substantial Z chromosome  
193 effects on gene expression, only known autosomal loci were considered when calculating  
194 library scaling factors. For non-parametric statistical analyses, we further normalized  
195 expression levels as fragments per kilobase per million mapped reads (FPKM).

196  
197 Failing to remove transcriptionally inactive genes from RNA-seq data sets assayed for sex  
198 chromosome dosage compensation can result in problematic biases, yet the most  
199 appropriate filtering method to apply is not well-established (Xiong et al. 2010;  
200 Kharchenko et al. 2011; Jue et al. 2013; Smith et al. 2014). Here we employ a probabilistic  
201 approach to assessing whether a given locus is expressed. The baySeq framework  
202 calculates the posterior likelihood (ranging from 0 to 1) that a given locus has no true

203 expression. (i.e., any observed reads should be considered “noise”, not signal) (Hardcastle  
204 2014). We primarily report results filtered at a value of 0.5, but results are comparable  
205 across a range thresholds tested, from 0.25 to 0.9 (see Supplementary Information)  
206

### 207 **Assessing Z chromosome and dosage effects: non-parametric statistics**

208 To test for Z chromosome dosage effects, we compared the expression of Z-linked and  
209 autosomal loci in males and females. Greater than 80% of predicted coding loci have been  
210 mapped to the 21 chromosomes of *H. melpomene*, with Z-linkage validated or corrected  
211 based on sex-specific genome sequencing coverage as reported in Martin *et al.* 2013  
212 (Martin et al. 2013; Heliconius Genome Consortium 2012). For each body part sampled,  
213 replicates were averaged by sex to give mean male and female FPKM values for each locus.  
214 Within each sex, Z-linked versus autosomal (Z:A) expression was compared, with  
215 differences in average expression evaluated via Mann-Whitey U test (MWU). The average  
216 male:female (M:F) expression ratio of Z-linked versus autosomal loci was also compared  
217 via MWU. Only loci actively expressed in both sexes were included when analyzing M:F  
218 ratios.

219  
220 We further explored the effects of Z chromosome dosage by comparing the average  
221 expression of Z-linked genes in males and females, split by quartiles of expression  
222 magnitude. Within quartile, differences between sex in average Z-linked expression was  
223 tested via MWU. Only loci actively expressed in both sexes were included in this analysis.  
224 This analysis closely resembles an analysis performed by Harrison *et al.* (2012) aimed at  
225 assessing how Z chromosome dosage effects depend on expression magnitude. However,  
226 we have slightly modified the analysis to avoid a bias we believe is inherent in the analysis  
227 as originally performed by Harrison *et al.* (2012). Rather than basing expression quartiles  
228 solely on male expression as was previously done, we calculated quartiles based on the  
229 maximum of male or female expression for each locus. The reasoning for this modification  
230 and the potential biases arising from ranking genes using data from only one sex is  
231 provided in the Appendix.

### 232 **Assessing sex-chromosome and dosage effects: Linear modeling of expression levels**

233 In addition to the application of non-parametric MWU tests, as is typically employed for  
234 investigations of sex-chromosome dosage compensation, we implemented a linear  
235 modeling framework to test for dosage and Z-specific effects on gene expression.  
236

237 The count data (after filtering) were fitted via maximum likelihood methods (Bates et al.  
238 2014) to a generalized linear mixed-effects model assuming a Poisson distribution and a  
239 log linkage function, using library scaling factor and gene length as offsets. We fit a series of  
240 models using various effects of chromosome, Z-linkage and sex, together with relevant

241 interactions between these effects. In all models, a per gene random effect was applied over  
242 sex, simultaneously allowing for variation in individual gene expression and differential  
243 expression of genes between the sexes.

244  
245 Using this modeling framework, we first tested for a global effect of Z-linkage on expression  
246 by comparing a model with both **sex** and **Zlink** as fixed effects (but no interaction)

$$247 \\ 248 X_{\{\text{gene, sample, sex, Z-linkage}\}} \sim \text{Z-linkage} + \text{sex} + (\text{sex}|\text{gene})$$

249  
250 versus a model with **sex** as the sole fixed effect.

$$251 \\ 252 X_{\{\text{gene, sample, sex, Z-linkage}\}} \sim \text{sex} + (\text{sex}|\text{gene})$$

253  
254 We then additionally tested for sex-specific effect on Z-expression (*i.e.*, a dosage effect), by  
255 fitting the full model

$$256 \\ 257 X_{\{\text{gene, sample, sex, Z-linkage}\}} \sim \text{Z-linkage} + \text{sex} + \text{Z-linkage} \times \text{sex} + (\text{sex}|\text{gene})$$

258  
259 to one without the interaction term.

260

## 261 Chromosomal distribution of sex-biased genes

262 Genes differentially expressed between males and females were identified using baySeq  
263 (Hardcastle & Kelly 2010). We applied a false-discovery rate of 0.05 and required at least a  
264 1.5-fold change in expression between sexes. To examine the chromosomal distribution of  
265 sex-biased genes, we counted the number of male, female, and unbiased genes among all  
266 actively expressed genes on each chromosome and also the unmapped scaffolds not yet  
267 assigned to chromosome. Gene activity was based on the probabilistic criteria, and  
268 assessed independently in males and females, so a gene expressed in males but not females  
269 was counted as male biased (and vice versa). Differences between the Z and autosomes in  
270 proportion of sex-biased genes were tested using a Fisher's exact test.

271

## 272 Results

### 273 Sequencing and read mapping

274 Data sets newly generated for this project were considerably larger than those generated by  
275 Briscoe et al. (2013). For the 40 samples sequenced here, the mean number of total reads  
276 sequenced was ~130 M, ranging from ~30 M to ~284 M reads. The 18 samples from



277 Briscoe et al. (2013) gave a mean of ~23 M, ranging from ~8 M to ~46 M reads. The  
278 proportion of reads aligned with RSEM was also generally higher for the abdomen and  
279 head samples compared to the Briscoe et al samples from antennae, mouth, and leg. The 40  
280 abdomen and head samples yielded a mean of 49% aligned, ranging from 21 to 65%. Mean  
281 percent mapping in the 18 Briscoe et al. (2013) samples was 37%, ranging from 9 to 55%.  
282 A complete summary of read counts and alignment statistics calculated with Picard's  
283 CollectAlignmentSummaryMetrics utility (<http://picard.sourceforge.net>) is provided in  
284 supplementary Table S1. Newly generated data sets for *H. melpomene* and *H. cydno* head  
285 and abdomen are available from the Sequencing Read Archive (SRA) project: XXXXX.  
286

### 287 Z-chromosome to autosome comparisons

288 For both sexes, all body parts in both species yielded average Z expression significantly  
289 lower than autosomal expression, as is evident from both linear modeling and non-  
290 parametric analyses (Fig 1 and Tables 1 & 2). Comparing median expression, the Z:A ratio  
291 ranged from about 0.5 to 0.75; ratios based on mean values are even lower. Linear  
292 modeling of these data showed Z-linkage had a significant negative effect on gene  
293 expression relative to autosomal average (Table 2). Average expression of individual  
294 autosomes varied somewhat in both sexes, but in nearly all cases the median Z expression  
295 was lower than any autosome (supplementary Fig 1)  
296

297 Notably, in several body parts sampled, the Z:A ratio was slightly greater in males than in  
298 females (Table 1). This apparent sex-effect on Z-chromosome expression was statistically  
299 confirmed with linear modeling. All tissues except antennae showed a significant  
300 interaction between sex and Z-linked expression, with greater male Z-linked expression  
301 (Table 2). This interaction can be interpreted as dosage effect of the Z chromosome on  
302 average gene expression. Note, however, that the magnitude of this interaction (dosage)  
303 effect is distinctly less than the effect of the Z-chromosome on gene expression levels.  
304

### 305 Male:Female expression ratios

306 Consistent with the dosage effect observed in the linear models, the Z chromosome showed  
307 a modest but consistent male bias in expression relative to autosomes in all samples  
308 (Figure 2 and Table 3). The distribution of M:F expression ratios was significantly greater  
309 on the Z (MWU  $p < 0.05$  after bonferroni correction) in all samples except antennae. The  
310 average magnitude of this Z-linked male expression bias ranged from 5-20% relative to  
311 autosomes based on the median M:F expression ratios (Table 2).

## 312 **Quartile analysis of Z expression**

313 Comparing Z-linked expression between sexes split by quartiles of expression showed no  
314 obvious pattern of discrepancy in male versus female Z-linked expression for tissues other  
315 than abdomen (Figure 3; supplemental Figure S2). In both abdomen samples, male  
316 expression was significantly greater than female in the fourth (highest expression) quartile,  
317 assuming a bonferroni correction for four tests.

## 318 **Chromosomal distribution of sex-biased genes**

319 The amount of sex-biased gene expression differed substantially between body parts.  
320 Tissues other than in the abdomen showed almost no differential expression between  
321 sexes using the criteria we applied (Table 4). In contrast, roughly 30% of active genes in  
322 abdomen were differentially expressed. We therefore analyzed the chromosomal  
323 distribution of sex-biased genes only in the abdomen. We observed a significant difference  
324 in the proportions of sex-biased genes on the Z versus the autosomes in both *H. melpomene*  
325 and *H. cydno* (Fisher's exact test, p-value  $\ll 0.001$ ). Figure 4 shows that the Z chromosome  
326 is distinctly enriched for male-biased and has a paucity of female-biased genes.

## 327 **Discussion**

### 328 **Dosage compensation**

329 Patterns of sex chromosome dosage compensation in *Heliconius* butterflies reflect  
330 an interesting amalgam of previous results from Lepidoptera. Similarly to the bombycoid  
331 moths *B. mori* and *M. sexta*, *Heliconius* males show reduced expression of Z chromosome  
332 genes below autosomal expression levels (Walters & Hardcastle 2011; Smith et al. 2014). In  
333 the two bombycoid species, male Z expression was low enough to be comparable to the  
334 female Z; there was no detectable dosage effect on Z-linked expression. Yet despite having  
335  $Z:A < 1$  in both sexes, *Heliconius* shows a dosage effect such that the Z chromosome retains  
336 a modest but consistent male-bias in expression. This result in *Heliconius* echoes the very  
337 substantial dosage effects reported for *P. interpunctella*. Unfortunately, the magnitude of  
338 these *Heliconius* dosage effects cannot easily be contrasted with *P. interpunctella* because  
339 direct male:female expression ratios were not reported for that species (Harrison et al.  
340 2012). However, the discrepancy in Z:A ratios between sexes of *P. interpunctella* is so large  
341 that we presume the dosage effects reflected in M:F expression ratios are far greater than  
342 we observe in *Heliconius*. Notably, no reduction in male Z-linked expression relative to  
343 autosomes was reported for *P. interpunctella*.

344 Thus in *Heliconius* we have further evidence that some Lepidoptera appear to have a  
345 molecular mechanism for globally reducing Z-linked expression in males that compensates  
346 for the difference in Z-chromosome dosage between sexes. Curiously, in *Heliconius* this  
347 mechanism appears to be operating imperfectly, resulting in a measurable dosage effect

348 that could arguably be called “incomplete” dosage compensation. However, the 5-20% Z-  
349 linked male bias in *Heliconius* is distinctly less than the ~50% bias typically reported for  
350 vertebrate ZW species (e.g., snakes, birds) identified as having “incomplete” sex  
351 chromosome dosage compensation (Ellegren et al. 2007; Itoh et al. 2010; Vicoso, Emerson,  
352 et al. 2013a). In the case of the female-heterogametic vertebrates, it is assumed that  
353 dosage compensation is “incomplete” because no global epigenetic mechanism exists to  
354 offset dosage effects, in contrast to the epigenetic mechanisms known in fruit flies,  
355 nematodes, and mammals. In the case of *Heliconius*, we would argue that “incomplete”  
356 dosage compensation occurs despite a global mechanism operating to balance Z:A ratios  
357 between the sexes, in this case reducing male Z-linked expression similar to that in females.

358 Further evidence that a global mechanism mitigates dosage effects in *Heliconius*  
359 comes from the lack of detectable transcriptional saturation on the Z chromosome. None of  
360 the purely somatic tissues sampled showed an effect of expression magnitude on  
361 differences between male and female Z-linked expression. This result contrasts with *P.*  
362 *interpunctella*, where the male expression bias increased with expression level, suggesting  
363 substantial transcriptional saturation due to uncompensated Z chromosome dosage.  
364 However, in abdomens we did observe significantly greater expression in males for the  
365 highest expression quartile, reminiscent of the *P. interpunctella* result. While this could be  
366 regarded as the effect of transcriptional saturation due to gene imbalance (i.e., a dosage  
367 effect), we tend to think it primarily reflects the unusually high expression levels of male-  
368 biased reproductive genes in the testes. If male-biased genes tend to have very high  
369 expression, this could produce the pattern observed. Robustly testing this hypothesis  
370 would require sequencing transcriptomes of gonads separately from somatic tissue; such  
371 data are currently not available in *Heliconius*. However, we note that in male abdomens,  
372 autosomal male-biased genes are expressed at significantly greater levels on average than  
373 unbiased or female biased genes (Kruskal-Wallis test,  $p \ll 0.001$ ; Supplemental Figure S3).  
374 In female abdomen, average expression of autosomal sex-biased genes does not differ from  
375 unbiased genes (Kruskal-Wallis test, N.S.). These patterns are consistent with our  
376 hypothesis of highly-expressed testes genes generating a pattern of male over-expression  
377 in the top quartile. Furthermore, this pattern would be exacerbated on the Z chromosome  
378 due to the over-representation of male-biased genes on the Z, as observed here (see below)  
379 and also reported in *B. mori* (Arunkumar et al. 2009; Walters & Hardcastle 2011).

380 Finally, we note there is additional experimental evidence for a global sex  
381 chromosome dosage mechanism that down-regulates male Z expression, at least in *B. mori*.  
382 Kiuchi et al (2014) recently reported the characterization of a Z-linked *masculinizing*  
383 protein that plays a fundamental role in *B. mori* sex determination. RNAi disruption of this  
384 *masc* protein does not much alter autosomal expression, but causes chromosome-wide up-  
385 regulation of Z-linked expression. Thus *masc* apparently controls a switch that initiates a  
386 global epigenetic reduction in Z-linked male expression.

387           What does this current set of results from Lepidoptera mean for the *heterogametic*  
388 *dichotomy hypothesis*? These different lines of evidence pointing to a global sex  
389 chromosome dosage compensation mechanism in several lepidopteran species undermine  
390 the simple notion that female heterogametic taxa do not evolve such mechanisms.  
391 However, there is substantial room for nuance here. First, despite emerging support for  
392 Lepidoptera as an exception, there is still substantial evidence that global dosage  
393 compensation is much less common in ZW than XY taxa (Mank 2013). Thus, while  
394 seemingly not a universal rule, the *heterogametic dichotomy hypothesis* still reflects a  
395 compelling and unexplained trend in sex chromosome evolution.

396           Second, results presented here from *Heliconius* suggest there is a need to separately  
397 consider observed patterns, proximate mechanism, and evolutionary process. In most  
398 cases, reporting that a species shows a pattern of “incomplete” dosage compensation has  
399 been assumed to indicate the organism lacks a global mechanism to mitigate sex  
400 chromosome dosage differences between sexes. We now observe that *Heliconius* butterflies  
401 appear to break this assumption. *Heliconius* seems to share a mechanism with bombycoid  
402 moths that reduces male Z-linked expression in order to balance Z:A expression between  
403 sexes (Walters & Hardcastle 2011; Kiuchi et al. 2014; Smith et al. 2014). In bombycoids  
404 this balancing is “perfect”, resulting in “complete” sex chromosome dosage compensation  
405 with no male bias in Z-linked M:F expression ratios. Yet *Heliconius* shows a pattern of  
406 “incomplete” dosage compensation despite apparently deploying this mechanism of down-  
407 regulating the male Z. This result defies a simple characterization as being consistent, or  
408 not, with the *heterogametic dichotomy hypothesis*. On the one hand, opposing the  
409 hypothesis, *Heliconius* butterflies apparently have a global mechanism of dosage  
410 compensation. On the other hand, supporting the hypothesis, dosage effects persist and  
411 compensation is “incomplete”. A similar scenario was recently reported for the neo-X of *D.*  
412 *pseudoobscura*, where the well-characterized dosage-compensation complex appears in  
413 some tissues and developmental stages to be “incompletely” compensating male neo-X  
414 expression to an X:A ratio  $\sim 0.85$ , much greater than 0.5 expected without compensation  
415 but still short of X:A  $\sim 1$  “complete” compensation observed in other *Drosophila* species and  
416 the ancestral portion of the *D. pseudoobscura* X (Nozawa et al. 2014). The functional and  
417 evolutionary significance of a lingering dosage effect in the presence of a global  
418 compensating mechanism is certainly a promising area for future research addressing the  
419 evolution of sex chromosome dosage compensation, especially the *heterogametic*  
420 *dichotomy hypothesis*.

421           A reasonable argument can be made that reducing Z-linked expression in males to  
422 balance Z:A expression in females cannot legitimately be considered sex chromosome  
423 dosage compensation, *sensu stricto*. The canonical evolutionary model of dosage  
424 compensation invokes stabilizing selection to maintain ancestral expression levels of sex-  
425 linked genes in the heterogametic sex as gametologs erode from the W (or Y) (Ohno 1967;  
426 Charlesworth 1978; Mank 2009a). This model assumes that substantial reduction in the

427 Z:A ratio is deleterious. Following this theory, sex chromosome dosage compensation  
428 should be defined as dosage *conservation* retaining the ancestral expression patterns  
429 where  $Z:A \sim 1$ . (This assumes all autosomes have roughly comparable average expression  
430 levels, a pattern that appears to be true in most species examined (Gupta et al. 2006; Deng  
431 et al. 2011; Hong Lin et al. 2011; Walters & Hardcastle 2011; Vicoso, Emerson, et al. 2013a;  
432 Vicoso, Kaiser, et al. 2013b).)

433 Thus, following this narrow and canonical view, sex chromosome dosage  
434 compensation should be limited only to situations where the heterogametic sex has  $Z:A \sim 1$   
435 (and, comparably,  $X:A \sim 1$ ). Notably, this would include cases where sexual antagonism of  
436 sex-linked expression presumably remains unresolved and results in hyper-expression of  
437 sex-linked genes (i.e.,  $X:A > 1$ ) in the homogametic sex (Prince et al. 2010; Mank et al. 2011;  
438 Allen et al. 2013). However, a mechanism that globally reduces Z-linked expression in  
439 males to balance Z:A expression in females, as appears to exist in Lepidoptera, is not  
440 consistent with canonical evolutionary theory regarding dosage compensation and sex  
441 chromosomes. Specifically, if  $Z:A < 1$  in heterogametic females is problematic, why would  
442 similarly reducing Z:A expression ratios in homogametic males resolve this problem?  
443 Doing so would compensate sex chromosome expression relative to autosomes between  
444 sexes, but presumably without dosage *conservation*. These results from Lepidoptera  
445 present a conundrum in light of current evolutionary theory (Walters & Hardcastle 2011).

446 Some resolution to this conundrum may come from better understanding the  
447 evolutionary history of the lepidopteran Z chromosome. Substantial ambiguity currently  
448 exists around the evolutionary relationship between the Z and W chromosomes. Basal  
449 Lepidoptera and Trichoptera (caddisflies, the sister group to Lepidoptera) are female-  
450 heterogametic but completely lack a W chromosome; females are ZO (Lukhtanov 2000;  
451 Sahara et al. 2011). The W chromosome now shared by most “advanced” (ditrysian)  
452 Lepidoptera arose long after the split between Lepidoptera and Trichoptera. One  
453 hypothetical origin of the W invokes a fusion between an autosome and the basal Z  
454 chromosome, with the remaining free autosome following the canonical evolutionary  
455 degradation into the W allosome shared by ditrysian species (Traut & Marec 1996). In this  
456 case, standard expectations of dosage compensation apply and the current observations of  
457  $Z:A < 1$  in males remain theoretically inconsistent.

458 However, karyotypes of basal pre-ditrysian and ditrysian species do not obviously  
459 indicate a lost autosome, a fact consistent with an alternative scenario that posits the W  
460 originating as a supernumerary B chromosome that acquired a sex-determining locus and  
461 meiotic pseudo-bivalence with the Z (Lukhtanov 2000). In this latter scenario, origins of  
462 the Z chromosome are quite ancient, likely involve the transition to female-heterogamety,  
463 and existing theory offers few expectations about how sex chromosomes and dosage effects  
464 might evolve.

465 The available data indicate substantial variation among lepidopteran lineages in  
466 patterns of sex chromosome dosage compensation. Considered in light of the most recent

467 lepidopteran phylogenies (Regier et al. 2013; Kawahara & Breinholt 2014), the patterns  
468 appear to reflect at least two evolutionary transitions in dosage compensation (Table 5).  
469 Two possible histories could explain these patterns. Either a similar dosage compensating  
470 mechanism evolved independently in butterflies and the ancestor of bombycoids, or an  
471 “incomplete” dosage compensating mechanism present in butterflies was refined to  
472 “completeness” in bombycoids but lost in pyralids.

473         Regardless of how dosage compensation has evolved among moths and butterflies,  
474 there are some intriguing similarities between the patterns seen among Lepidoptera and  
475 the emerging understanding of sex chromosome dosage compensation – or the lack thereof  
476 – in mammals. Although still controversial, there is a growing consensus the mammalian X  
477 evolved without dosage compensation and, in light of inferred ancestral expression levels  
478 on the X, the mammalian X:A ratio is ~0.5 in both sexes (Julien et al. 2012; F Lin et al. 2012;  
479 Pessia et al. 2013). This view means that mammalian X-chromosome inactivation (XCI)  
480 effectively balances X-linked expression between sexes by halving the potential dose in  
481 females. A similar pattern was also recently reported in twisted-wing insects  
482 (Strepsiptera) (Mahajan & Bachtrog 2015). This scenario appears analogous to  
483 Lepidoptera, where Z-linked expression is similarly balanced between sexes by an  
484 apparent global reduction in expression in the homogametic sex. Investigation into the  
485 functional mechanisms of lepidopteran dosage compensation might help to resolve the  
486 origins of this mechanism. At this point it seems possible that Lepidoptera, Strepsiptera,  
487 and mammals have converged on similar mechanisms of mitigating sex chromosome  
488 dosage differences between the sexes.

489

#### 490 **Chromosomal distribution of sex-biased genes**

491         The general lack of sex-biased genes in purely somatic, non-reproductive tissue in  
492 *Heliconius* is unusual. There is good precedent from many other animals, particularly fruit  
493 flies and mice, that such tissues should contain at least dozens if not hundreds of genes  
494 with sex-biased expression (Yang et al. 2006; Catalán et al. 2012; Meisel et al. 2012). Even  
495 among other Lepidoptera such tissues yield numerous sex-biased genes (Walters &  
496 Hardcastle 2011; Smith et al. 2014). Thus it is tempting to explain away this result through  
497 a lack of statistical power or other methodological artifacts. Yet this seems unlikely  
498 because abdomens yielded thousands of differentially expressed loci. Heads and abdomens  
499 in this study were from the same individuals, with RNA extracted and analyzed  
500 simultaneously in parallel. Furthermore, the mouth, leg, and antennae data were generated  
501 independently of the head and abdomen samples but yielded a similar paucity of sex-  
502 biased genes. So it may simply be that *Heliconius* butterflies have unusually monomorphic  
503 patterns of gene expression between sexes for tissues unrelated to reproduction. Certainly  
504 phenotypic sexual dimorphism is quite limited in *Heliconius* compared to most moths and  
505 many butterflies (personal observations, JRW & CJD).

506 In contrast to non-reproductive tissues, the abdomens yielded a very large number  
507 of genes with significantly dimorphic expression. The distribution of such sex-biased genes  
508 is clearly different between the Z and autosomes, with male-biased genes more abundant  
509 and female-biased genes less abundant on the Z relative to autosomes, which have  
510 approximately equal amounts of male- and female-biased genes (Figure 4). A positive  
511 association between sex-linkage and expression biased towards the homogametic sex has  
512 been widely observed in several species of both male and female heterogametic taxa,  
513 including Lepidoptera (Reinke et al. 2000; Khil et al. 2004; Kaiser & Ellegren 2006;  
514 Arunkumar et al. 2009; Walters & Hardcastle 2011; Meisel et al. 2012). This pattern is  
515 generally predicted by models of sexually antagonistic evolution, specifically when sexually  
516 antagonistic mutations are fully or partially dominant (Rice 1984; Ellegren & Parsch 2007;  
517 Connallon & Clark 2010). Thus our results offer further support for the theory that the  
518 asymmetrical transmission of sex chromosomes favors sex-linked accumulation of  
519 mutations benefitting the homogametic sex.

520 A deficit of genes biased towards the heterogametic sex is also predicted by the  
521 same theory, but observations are much less consistent across taxa and seem to depend on  
522 a range biological idiosyncrasies including meiotic sex chromosome inactivation, tissue  
523 specificity of expression, and mechanisms of dosage compensation (Connallon & Clark  
524 2010; Meisel et al. 2012; Parsch & Ellegren 2013). Nonetheless, there is at least one  
525 promising coincidence of theory and data that has been recently noted: species with equal  
526 rates of recombination between sexes tend to show an excess of sex-linked genes with  
527 heterogametic bias (e.g. birds, mammals), while in *Drosophila*, where males do not  
528 recombine, a paucity of male-biased genes on the X is often reported (Connallon & Clark  
529 2010). Since lepidopteran females lack recombination, the paucity of female-biased genes  
530 on the Z in *Heliconius* is consistent with this pattern. However, our data represent only an  
531 initial and broadly scoped assessment of this phenomenon.  
532

## 533 Conclusion

534 Our results are consistent with an increasing body of evidence that many species of  
535 moths and butterflies possess a sex chromosome dosage compensating mechanism that  
536 operates by reducing Z chromosome expression in males. However, this mechanism  
537 appears to be imperfect in *Heliconius*, resulting in a moderate Z chromosome dosage effect.  
538 These results counter the emerging view that female-heterogametic ZW taxa have  
539 incomplete dosage compensation because they lack a chromosome-wide epigenetic  
540 mechanism mediating sex chromosome dosage compensation. In the case of *Heliconius*, sex  
541 chromosome dosage effects apparently persist despite such a mechanism. This result adds  
542 additional complexity to patterns of dosage compensation observed in Lepidoptera. Finally,

543 patterns of sex-biased expression in our data highlight the impact of sexually antagonistic  
544 selection in shaping genome evolution.  
545

## 546 **Acknowledgements**

547 This research was supported in part by a NSF post-doctoral fellowship to JRW (DBI-  
548 0905698). RNA sequencing was funded by the “Capacity and Capability Challenge  
549 Programme” from The Genome Analysis Centre, Norwich, UK. Luiqi (Aloy) Gu provided  
550 valuable comments on the manuscript.  
551  
552



## 553 **References**

554

555 Ahola V et al. 2014. The Glanville fritillary genome retains an ancient karyotype and reveals  
556 selective chromosomal fusions in Lepidoptera. *Nature Communications*. 5:1–9. doi:  
557 10.1038/ncomms5737.

558 Allen SL, Bonduriansky R, Chenoweth SF. 2013. The Genomic Distribution of Sex-Biased  
559 Genes in *Drosophila serrata*: X Chromosome Demasculinization, Feminization, and  
560 Hyperexpression in Both Sexes. *Genome Biology and Evolution*. 5:1986–1994. doi:  
561 10.1093/gbe/evt145.

562 Arunkumar KP, Mita K, Nagaraju J. 2009. The silkworm Z chromosome is enriched in testis-  
563 specific genes. *Genetics*. 182:493–501. doi: 10.1534/genetics.108.099994.

564 Bachtrog D. 2006. A dynamic view of sex chromosome evolution. *Curr Opin Genet Dev*.  
565 16:578–585. doi: 10.1016/j.gde.2006.10.007.

566 Bachtrog D. 2013. Y-chromosome evolution: emerging insights into processes of Y-  
567 chromosome degeneration. *Nat Rev Genet*. 14:113–124. doi: 10.1038/nrg3366.

568 Bachtrog D et al. 2011. Are all sex chromosomes created equal? *Trends Genet*. 27:350–357.  
569 doi: 10.1016/j.tig.2011.05.005.

570 Bates D, Machler M, Bolker B, Walker S. 2014. Fitting Linear Mixed-Effects Models using  
571 lme4. arXiv. <http://arxiv.org/abs/1406.5823>

572 Birchler JA, Bhadra U, Bhadra MP, Auger DL. 2001. Dosage-dependent gene regulation in  
573 multicellular eukaryotes: implications for dosage compensation, aneuploid syndromes, and  
574 quantitative traits. *Dev Biol*. 234:275–288. doi: 10.1006/dbio.2001.0262.

575 Briscoe AD et al. 2013. Female behaviour drives expression and evolution of gustatory  
576 receptors in butterflies. *PLoS Genet*. 9:e1003620. doi: 10.1371/journal.pgen.1003620.

577 Catalán A, Hutter S, Parsch J. 2012. Population and sex differences in *Drosophila*  
578 *melanogaster* brain gene expression. *BMC Genomics*. 13:654. doi: 10.1186/1471-2164-13-  
579 654.

580 Charlesworth B. 1978. Model for evolution of Y chromosomes and dosage compensation. *P*  
581 *Natl Acad Sci Usa*. 75:5618–5622.

582 Charlesworth B. 1996. The evolution of chromosomal sex determination and dosage  
583 compensation. *Curr Biol*. 6:149–162.

584 Charlesworth B, Charlesworth D. 2000. The degeneration of Y chromosomes. *Philos Trans*  
585 *R Soc Lond, B, Biol Sci*. 355:1563–1572. doi: 10.1098/rstb.2000.0717.

- 586 Connallon T, Clark AG. 2010. Sex linkage, sex-specific selection, and the role of  
587 recombination in the evolution of sexually dimorphic gene expression. *Evolution*. 64:3417–  
588 3442. doi: 10.1111/j.1558-5646.2010.01136.x.
- 589 Deng X et al. 2011. Evidence for compensatory upregulation of expressed X-linked genes in  
590 mammals, *Caenorhabditis elegans* and *Drosophila melanogaster*. *Nat Genet*. 43:1179–1185.  
591 doi: 10.1038/ng.948.
- 592 Disteche CM. 2012. Dosage Compensation of the Sex Chromosomes. *Annu Rev Genet*.  
593 46:537–560. doi: 10.1146/annurev-genet-110711-155454.
- 594 Dunlap-Pianka H, Boggs CL, Gilbert LE. 1977. Ovarian Dynamics in Heliconiine Butterflies:  
595 Programmed Senescence versus Eternal Youth. *Science*. 197:487–490. doi:  
596 10.1126/science.197.4302.487.
- 597 Ellegren H et al. 2007. Faced with inequality: chicken do not have a general dosage  
598 compensation of sex-linked genes. *BMC Biol*. 5:40. doi: 10.1186/1741-7007-5-40.
- 599 Ellegren H, Parsch J. 2007. The evolution of sex-biased genes and sex-biased gene  
600 expression. *Nat Rev Genet*. 8:689–698. doi: 10.1038/nrg2167.
- 601 Ferrari F, Alekseyenko AA, Park PJ, Kuroda MI. 2014. Transcriptional control of a whole  
602 chromosome: emerging models for dosage compensation. Nature Publishing Group.  
603 21:118–125. doi: 10.1038/nsmb.2763.
- 604 Gupta V et al. 2006. Global analysis of X-chromosome dosage compensation. *J Biol*. 5:3. doi:  
605 10.1186/jbiol30.
- 606 Hamada FN. 2005. Global regulation of X chromosomal genes by the MSL complex in  
607 *Drosophila melanogaster*. *Genes & Development*. 19:2289–2294. doi:  
608 10.1101/gad.1343705.
- 609 Hardcastle TJ. 2014. Generalised empirical Bayesian methods for discovery of differential  
610 data in high-throughput biology. *bioRxiv*. doi: 10.1101/011890.
- 611 Hardcastle TJ, Kelly KA. 2010. baySeq: empirical Bayesian methods for identifying  
612 differential expression in sequence count data. *BMC Bioinformatics*. 11:422. doi:  
613 10.1186/1471-2105-11-422.
- 614 Harrison PW, Mank JE, Wedell N. 2012. Incomplete Sex Chromosome Dosage Compensation  
615 in the Indian Meal Moth, *Plodia interpunctella*, Based on De Novo Transcriptome Assembly.  
616 *Genome Biology and Evolution*. 4:1118–1126. doi: 10.1093/gbe/evs086.
- 617 Heliconius Genome Consortium. 2012. Butterfly genome reveals promiscuous exchange of  
618 mimicry adaptations among species. *Nature*. 487:94–98. doi: 10.1038/nature11041.
- 619 Itoh Y et al. 2007. Dosage compensation is less effective in birds than in mammals. *J Biol*.

- 620 6:2. doi: 10.1186/jbiol53.
- 621 Itoh Y et al. 2010. Sex bias and dosage compensation in the zebra finch versus chicken  
622 genomes: general and specialized patterns among birds. *Genome Res.* 20:512–518. doi:  
623 10.1101/gr.102343.109.
- 624 Jue NK et al. 2013. Determination of dosage compensation of the mammalian X  
625 chromosome by RNA-seq is independent of analytical approach. *BMC Genomics.* 14:1–1. doi:  
626 10.1186/1471-2164-14-150.
- 627 Julien P et al. 2012. Mechanisms and Evolutionary Patterns of Mammalian and Avian  
628 Dosage Compensation. Barton, NH, editor. *PLoS Biol.* 10:e1001328. doi:  
629 10.1371/journal.pbio.1001328.t002.
- 630 Kaiser VB, Ellegren H. 2006. Nonrandom distribution of genes with sex-biased expression  
631 in the chicken genome. *Evolution.* 60:1945–1951.
- 632 Kawahara AY, Breinholt JW. 2014. Phylogenomics provides strong evidence for  
633 relationships of butterflies and moths. *Proceedings of the Royal Society B: Biological  
634 Sciences.* 281:20140970–20140970. doi: 10.1126/science.1174096.
- 635 Kharchenko PV, Xi R, Park PJ. 2011. correspondence. *Nat Genet.* 43:1167–1169. doi:  
636 10.1038/ng.991.
- 637 Khil PP, Smirnova NA, Romanienko PJ, Camerini-Otero RD. 2004. The mouse X chromosome  
638 is enriched for sex-biased genes not subject to selection by meiotic sex chromosome  
639 inactivation. *Nat Genet.* 36:642–646. doi: 10.1038/ng1368.
- 640 Kiuchi T et al. 2014. A single female-specific piRNA is the primary determiner of sex in the  
641 silkworm. *Nature.* 509:633–636. doi: 10.1038/nature13315.
- 642 Langmead B, Salzberg SL. 2012. Fast gapped-read alignment with Bowtie 2. *Nat Methods.*  
643 9:357–359. doi: 10.1038/nmeth.1923.
- 644 Li B, Dewey CN. 2011. RSEM: accurate transcript quantification from RNA-Seq data with or  
645 without a reference genome. *BMC Bioinformatics.* 12:323. doi: 10.1186/1471-2105-12-  
646 323.
- 647 Lin F, Xing K, Zhang J, He X. 2012. Expression reduction in mammalian X chromosome  
648 evolution refutes Ohno's hypothesis of dosage compensation. doi:  
649 10.1073/pnas.1201816109/-/DCSupplemental/pnas.201201816SI.pdf.
- 650 Lin H et al. 2011. ng.992. *Nat Genet.* 43:1169–1170. doi: 10.1038/ng.992.
- 651 Lukhtanov VA. 2000. Sex chromatin and sex chromosome systems in nonditrysian  
652 Lepidoptera (Insecta). *Journal of Zoological Systematics and Evolutionary Research.* 38:73–  
653 79.

- 654 Mahajan S, Bachtrog D. 2015. Partial Dosage Compensation in Strepsiptera, a Sister Group  
655 of Beetles. *Genome Biology and Evolution*. 7:591–600. doi: 10.1093/gbe/evv008.
- 656 Mank JE. 2013. Sex chromosome dosage compensation: definitely not for everyone. *Trends*  
657 *Genet.* 1–7. doi: 10.1016/j.tig.2013.07.005.
- 658 Mank JE. 2009. The W, X, Y and Z of sex-chromosome dosage compensation. *Trends Genet.*  
659 25:226–233. doi: 10.1016/j.tig.2009.03.005.
- 660 Mank JE, Ellegren H. 2009. All dosage compensation is local: gene-by-gene regulation of  
661 sex-biased expression on the chicken Z chromosome. *Heredity*. 102:312–320. doi:  
662 10.1038/hdy.2008.116.
- 663 Mank JE, Hosken DJ, Wedell N. 2011. Some inconvenient truths about sex chromosome  
664 dosage compensation and the potential role of sexual conflict. *Evolution*. 65:2133–2144.  
665 doi: 10.1111/j.1558-5646.2011.01316.x.
- 666 Martin SH et al. 2013. Genome-wide evidence for speciation with gene flow in *Heliconius*  
667 butterflies. *Genome Res.* 23:1817–1828. doi: 10.1101/gr.159426.113.
- 668 Meisel RP, Malone JH, Clark AG. 2012. Disentangling the relationship between sex-biased  
669 gene expression and X-linkage. *Genome Res.* doi: 10.1101/gr.132100.111.
- 670 Naurin S, Hansson B, Bensch S, Hasselquist D. 2010. Why does dosage compensation differ  
671 between XY and ZW taxa? *Trends Genet.* 26:15–20. doi: 10.1016/j.tig.2009.11.006.
- 672 Naurin S, Hansson B, Hasselquist D, Kim Y-H, Bensch S. 2011. The sex-biased brain: sexual  
673 dimorphism in gene expression in two species of songbirds. *BMC Genomics*. 12:37. doi:  
674 10.1186/1471-2164-12-37.
- 675 Nguyen DK, Disteche CM. 2006. Dosage compensation of the active X chromosome in  
676 mammals. *Nat Genet.* 38:47–53. doi: 10.1038/ng1705.
- 677 Nozawa M, Fukuda N, Ikeo K, Gojobori T. 2014. Tissue- and Stage-Dependent Dosage  
678 Compensation on the Neo-X Chromosome in *Drosophila pseudoobscura*. *Molecular Biology*  
679 *and Evolution*. 31:614–624. doi: 10.1093/molbev/mst239.
- 680 Ohno S. 1967. *Sex chromosomes and sex-linked genes*. Springer.
- 681 Parsch J, Ellegren H. 2013. The evolutionary causes and consequences of sex-biased gene  
682 expression. *Nat Rev Genet.* 14:83–87. doi: 10.1038/nrg3376.
- 683 Pessia E, Engelstädter J, Marais GAB. 2013. The evolution of X chromosome inactivation in  
684 mammals: the demise of Ohno's hypothesis? *Cell. Mol. Life Sci.* 71:1383–1394. doi:  
685 10.1007/s00018-013-1499-6.
- 686 Prince EG, Kirkland D, Demuth JP. 2010. Hyperexpression of the X chromosome in both  
687 sexes results in extensive female bias of X-linked genes in the flour beetle. *Genome Biology*

- 688 and Evolution. 2:336–346. doi: 10.1093/gbe/evq024.
- 689 Pringle EG et al. 2007. Synteny and chromosome evolution in the lepidoptera: evidence  
690 from mapping in *Heliconius melpomene*. Genetics. 177:417–426. doi:  
691 10.1534/genetics.107.073122.
- 692 Quek SP et al. 2010. Dissecting comimetic radiations in *Heliconius* reveals divergent  
693 histories of convergent butterflies. P Natl Acad Sci Usa. 107:7365–7370. doi:  
694 10.1073/pnas.0911572107.
- 695 R Development Core Team. 2014. R: A Language and Environment for Statistical  
696 Computing. <http://www.R-project.org/>.
- 697 Regier JC et al. 2013. A Large-Scale, Higher-Level, Molecular Phylogenetic Study of the  
698 Insect Order Lepidoptera (Moths and Butterflies) Moreau, CS, editor. PLoS ONE. 8:e58568.  
699 doi: 10.1371/journal.pone.0058568.s012.
- 700 Reinke V et al. 2000. A global profile of germline gene expression in *C. elegans*. Mol Cell.  
701 6:605–616.
- 702 Rice W. 1984. Sex chromosomes and the evolution of sexual dimorphism. Evolution.  
703 38:735–742.
- 704 Sahara K, Yoshido A, Traut W. 2011. Sex chromosome evolution in moths and butterflies.  
705 Chromosome Res. 20:83–94. doi: 10.1007/s10577-011-9262-z.
- 706 Smith G, Chen YR, Blissard GW, Briscoe AD. 2014. Complete Dosage Compensation and Sex-  
707 Biased Gene Expression in the Moth *Manduca sexta*. Genome Biology and Evolution. 6:526–  
708 537. doi: 10.1093/gbe/evu035.
- 709 Straub T, Becker PB. 2011. Transcription modulation chromosome-wide: universal features  
710 and principles of dosage compensation in worms and flies. Curr Opin Genet Dev. 21:147–  
711 153. doi: 10.1016/j.gde.2011.01.012.
- 712 Suetsugu Y et al. 2013. Large scale full-length cDNA sequencing reveals a unique genomic  
713 landscape in a lepidopteran model insect, *Bombyx mori*. G3 (Bethesda). 3:1481–1492. doi:  
714 10.1534/g3.113.006239/-/DC1.
- 715 Traut W, Marec F. 1996. Sex chromatin in lepidoptera. Q Rev Biol. 71:239–256.
- 716 Veitia RA, Veyrunes F, Bottani S, Birchler JA. 2015. X chromosome inactivation and active X  
717 upregulation in therian mammals: facts, questions, and hypotheses. J Mol Cell Biol. 7:2–11.  
718 doi: 10.1093/jmcb/mjv001.
- 719 Vicoso B, Bachtrog D. 2011a. Lack of Global Dosage Compensation in *Schistosoma mansoni*,  
720 a Female-Heterogametic Parasite. Genome Biology and Evolution. 3:230–235. doi:  
721 10.1093/gbe/evr010.

- 722 Vicoso B, Bachtrog D. 2011b. Lack of global dosage compensation in *Schistosoma mansoni*,  
723 a female-heterogametic parasite. *Genome Biology and Evolution*. doi: 10.1093/gbe/evr010.
- 724 Vicoso B, Bachtrog D. 2009. Progress and prospects toward our understanding of the  
725 evolution of dosage compensation. *Chromosome Res.* 17:585–602. doi: 10.1007/s10577-  
726 009-9053-y.
- 727 Vicoso B, Emerson JJ, Zektser Y, Mahajan S, Bachtrog D. 2013a. Comparative Sex  
728 Chromosome Genomics in Snakes: Differentiation, Evolutionary Strata, and Lack of Global  
729 Dosage Compensation Barton, NH, editor. *PLoS Biol.* 11:e1001643. doi:  
730 10.1371/journal.pbio.1001643.s024.
- 731 Vicoso B, Kaiser VB, Bachtrog D. 2013b. Sex-biased gene expression at homomorphic sex  
732 chromosomes in emus and its implication for sex chromosome evolution. *Proceedings of*  
733 *the National Academy of Sciences.* 110:6453–6458. doi: 10.1073/pnas.1217027110.
- 734 Walters JR, Hardcastle TJ. 2011. Getting a full dose? Reconsidering sex chromosome dosage  
735 compensation in the silkworm, *Bombyx mori*. *Genome Biology and Evolution.* 3:491–504.  
736 doi: 10.1093/gbe/evr036.
- 737 Xia Q et al. 2007. Microarray-based gene expression profiles in multiple tissues of the  
738 domesticated silkworm, *Bombyx mori*. *Genome Biol.* 8:R162. doi: 10.1186/gb-2007-8-8-  
739 r162.
- 740 Xiong Y et al. 2010. RNA sequencing shows no dosage compensation of the active X-  
741 chromosome. *Nat Genet.* 42:1043–1047. doi: 10.1038/ng.711.
- 742 Yang X et al. 2006. Tissue-specific expression and regulation of sexually dimorphic genes in  
743 mice. *Genome Res.* 16:995–1004. doi: 10.1101/gr.5217506.
- 744 Yue Z et al. 2013. A heterozygous moth genome provides insights into herbivory and  
745 detoxification. *Nat Genet.* 1–8. doi: 10.1038/ng.2524.
- 746 Zha X et al. 2009. Dosage analysis of Z chromosome genes using microarray in silkworm,  
747 *Bombyx mori*. *Insect Biochem Mol Biol.* 39:315–321. doi: 10.1016/j.ibmb.2008.12.003.
- 748

Fig. 1. Distributions of log<sub>2</sub>-transformed gene expression levels (FPKM) for the Z-chromosome (Z; red) and autosomes (A; grey) in male and female *Heliconius* butterflies in several tissues. Boxes indicate the interquartile range (IQR) around the median (black bar) and whiskers extend to 1.5 times the IQR; outlier points beyond 1.5 IQR are not shown. Non-parametric tests as well as linear modeling indicate a significant reduction in Z-chromosome expression relative to autosomes in both sexes for all tissues (see Tables 1 & 2). Data were filtered with a null expression likelihood of 0.5 and are representative of results using a range of likelihood thresholds (supplementary Table 2).

Fig. 2. Distribution density plots of log<sub>2</sub>(Male:Female) expression ratios for the Z-chromosome (Z; red) and autosomes (A; black) in male and female *Heliconius* butterflies in several tissues. Dashed lines indicate median values. Non-parametric tests and linear modeling indicate all tissues but antenna show a modest but significant sex-chromosome dosage effect, visualized here as a shift towards male-biased expression among Z-linked loci (see Tables 2 & 3). Antenna also shows this pattern but the effect is not statistically significant.

Fig. 3. Comparison of male (blue) and female (red) expression levels for Z-linked loci, divided into quartiles based on the maximum of male or female expression for *H. melpomene* head and abdomen. Boxes indicate the interquartile range (IQR) around the median (black bar) and whiskers extend to 1.5 times the IQR. An asterisk (\*) indicates significant difference in average expression (bonferroni corrected MWU p-value < 0.05). Plots for all seven tissue samples are given in supplemental Figure S2.

Fig. 4. Proportions of sex-biased genes across the chromosomes in abdomens for *H. cydno* and *H. melpomene*. A gene was considered sex-biased if significantly differentially expressed between males and females with FDR < 0.05 and a minimum fold-change of 1.5. The two larger bars at the bottom represent the Z chromosome individually and the combined results across autosomes (A). Smaller bars (1-20) represent data for individual chromosomes and "UM" indicates genes not mapped to chromosome.

## 1 Appendix: Analysis of Z-linked expression quartiles between male and female

2

3 Harrison et al. (2011) analyzed patterns of sex-chromosome dosage compensation  
4 in the Indian meal moth, *Plodia interpunctella*. One aspect of their analysis contrasted male  
5 and female expression of Z-linked loci split by quartiles of expression magnitude. This  
6 analysis is intended to illustrate that dosage effects increase with gene expression level.  
7 Importantly, Harrison et al. defined quartiles of expression based solely on male  
8 expression; female expression was ignored when binning loci into subsets to assess dosage  
9 effects. Here we demonstrate that, in the context of RNA-seq data, their approach  
10 potentially leads to an artifactual bias that would result in expression appearing greater in  
11 males than females for highly expressed loci, as reported by Harrison et al. (2011).

12 We judge it unlikely that this bias can completely explain the patterns reported for  
13 *P. interpunctella*. Therefore we have not re-analyzed the data of Harrison et al. and we do  
14 not question their qualitative conclusions regarding the relationship between relative  
15 dosage effects and the magnitude of gene expression. Nonetheless, for the sake of future  
16 analyses of sex chromosome dosage compensation, we feel it worthwhile to describe what  
17 we believe to be a better method of analysis. We suggest that quartile binning based on the  
18 *maximum of male or female expression at each locus* provides a simple adjustment to the  
19 analysis that removes bias imposed by binning on data from only one sex.

20 This analysis tests whether dosage effects (i.e. greater Z-linked expression in males)  
21 increases with magnitude of gene expression. It is based on the idea that, for any given  
22 locus, the maximum level of gene expression is limited by the rate of translation because  
23 the translational machinery becomes saturated. In the absence of sex chromosome dosage  
24 compensation, highly expressed genes at or near the point of maximum translation will  
25 exhibit a strong dosage effect; the single female gene copy cannot reach the transcription  
26 rate of two copies in male. In contrast, genes expressed at low to intermediate levels will  
27 exhibit little or no dosage effect because sufficient transcripts can be generated from a  
28 single female copy to balance transcript levels in males. The resulting pattern is a  
29 discrepancy between male and female Z-linked expression that increases with the  
30 magnitude of gene expression.

31 In principle, it should be possible capture this effect by comparing the distributions  
32 of male and female expression of Z-linked genes that are expressed at relatively high or low  
33 absolute expression levels. Following the approach of Harrison et al., binning loci by  
34 quartiles of expression should reveal increasingly greater relative expression in males with  
35 each additional quartile if translational saturation effects are occurring in the absence of  
36 dosage compensation.

37 However, *it is in the grouping of loci into bins of relative expression levels where a bias*  
38 *may arise*. Binning based on expression in only one sex can cause expression in that sex to  
39 appear relatively reduced among weakly expressed genes, but relatively high for strongly



40 expressed genes, even if the distribution of gene expression is identical for both sexes.  
41 Thus grouping loci by expression quartiles using values in only one sex can cause biases in  
42 which sex appears to have relatively greater expression in each quartile. This phenomenon  
43 is best demonstrated with a simple simulation in which the average expression of males  
44 and females is identical.

45 Described briefly, the simulation begins by generating “true” expression values for  
46 10,000 loci as random draws from a log-normal distribution. Variation in expression levels  
47 for male and female “observations” are created by independently adding values drawn  
48 from a normal distribution with a mean of 0 to each “true” expression value. Additionally,  
49 1000 loci are further modified to be differentially expressed between males and females,  
50 500 in each direction. For the sake of brevity and clarity, we refer the reader seeking  
51 further details to the attached R script encoding the simulation. The “MA-plot” of simulated  
52 gene expression data (Figure A1) should suffice to convince most readers that the  
53 simulated data reasonably represents gene expression data.

54 Using these simulated values, we can split the dataset into quartiles of expression  
55 and compare the distributions between sexes (Figure A2). Intuitively, since all differences  
56 between male and female expression are random and unbiased, we would expect no  
57 systematic differences between sexes at any expression level. However, this outcome is  
58 only observed if quartiles are based *on the maximum of male or female expression* for each  
59 locus. Ranking using only one sex clearly results in a strongly biased outcome that depends  
60 on which sex is used for ranking (Figure A2).

61 We emphasize that this simulation has been created primarily to illustrate our point  
62 about biases that potentially arise from quartile analyses based on ranking on one sex  
63 alone. We do not claim that the simulation is highly realistic and we have not extensively  
64 explored the effect of changing simulation parameters. Our narrow aim is to communicate  
65 an intuitive and straightforward demonstration of why we have deviated from the  
66 precedent set by Harrison et al. (2012) for this type of analysis.

67

68

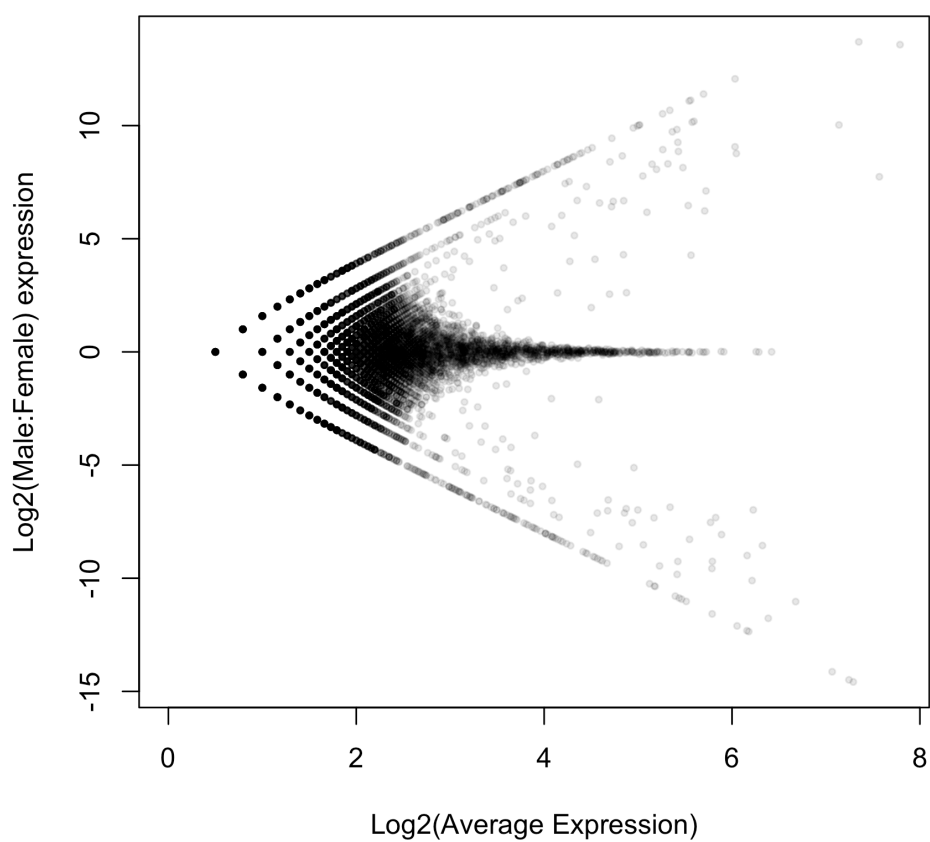

69

70

71

72

73

Fig. A1. MA-plot of simulated male and female expression data.

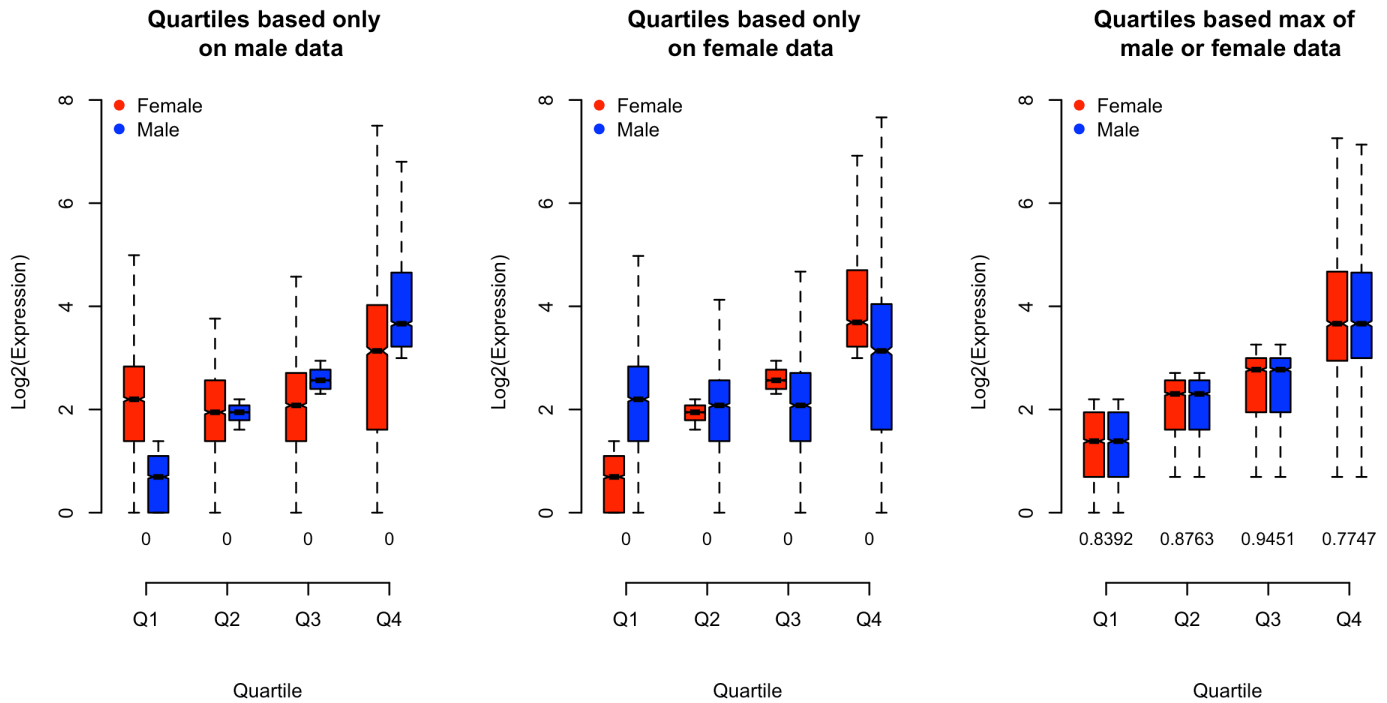

75 Fig. A2. Quartile comparisons of simulated gene expression distributions of simulated male  
76 and female expression levels. Comparison of male (blue) and female (red) expression levels  
77 for loci, divided into quartiles based on male expression (left panel), female expression  
78 (center panel), and the maximum male or female expression (right panel). Boxes indicate  
79 the interquartile range (IQR) around the median (black bar) and whiskers extend to 1.5  
80 times the IQR. P-values of a Mann-Whitney U test of inequality between males and females  
81 are printed for each quartile along the x-axis, with "0" indicating  $P < 0.0001$ .

82

83

84

85

Table 1. Summary of average expression of Z-linked and autosomal loci across several tissues in *Heliconius* butterflies. Results reflect data filtering with a null expression likelihood of 0.5 and are representative of results using a range of likelihood thresholds (supplementary Table S2)

| Statistic                            | Abdomen<br>( <i>H. cydno</i> ) |        | Head<br>( <i>H. cydno</i> ) |        | Abdomen<br>( <i>H. melpomene</i> ) |        | Head<br>( <i>H. melpomene</i> ) |        | Antenna |        | Leg    |        | Mouth  |        |
|--------------------------------------|--------------------------------|--------|-----------------------------|--------|------------------------------------|--------|---------------------------------|--------|---------|--------|--------|--------|--------|--------|
|                                      | Male                           | Female | Male                        | Female | Male                               | Female | Male                            | Female | Male    | Female | Male   | Female | Male   | Female |
| Mean Z-linked FPKM                   | 40.66                          | 26.15  | 29.27                       | 23.78  | 36.63                              | 29.6   | 28.14                           | 29.18  | 30.32   | 27.3   | 47.99  | 41.65  | 40.74  | 35.07  |
| Mean autosomal FPKM                  | 85.45                          | 54.81  | 70.64                       | 53.6   | 63.42                              | 53.33  | 54.2                            | 68.43  | 75.66   | 67.84  | 63.3   | 59.02  | 71.77  | 68.06  |
| Z:A ratio of mean expression         | 0.4758                         | 0.4771 | 0.4144                      | 0.4437 | 0.5776                             | 0.555  | 0.5192                          | 0.4264 | 0.4007  | 0.4024 | 0.7581 | 0.7057 | 0.5676 | 0.5153 |
| Median Z-linked FPKM                 | 7.15                           | 6.15   | 5.48                        | 5.23   | 8.53                               | 7.38   | 6.8                             | 6.59   | 10.38   | 10.26  | 9.12   | 7.59   | 9.03   | 7.81   |
| Median autosomal FPKM                | 11.67                          | 12.12  | 7.78                        | 7.82   | 11.6                               | 12.71  | 8.93                            | 9.03   | 14.65   | 14.93  | 12.43  | 11.69  | 12.13  | 11.96  |
| Z:A ratio of median expression       | 0.6127                         | 0.5074 | 0.7044                      | 0.6688 | 0.7353                             | 0.5806 | 0.7615                          | 0.7298 | 0.7085  | 0.6872 | 0.7337 | 0.6493 | 0.7444 | 0.653  |
| MWU p-value:<br>Autosomal ≠ Z-linked | <.0001                         | <.0001 | <.0001                      | <.0001 | <.0001                             | <.0001 | .0007                           | .0001  | <.0001  | <.0001 | .0003  | <.0001 | .0002  | <.0001 |
| No. expressed Z-linked loci          | 481                            | 403    | 443                         | 429    | 506                                | 417    | 449                             | 447    | 392     | 394    | 357    | 385    | 361    | 390    |
| No. expressed autosomal loci         | 10638                          | 9758   | 10272                       | 10050  | 11020                              | 10014  | 10004                           | 10383  | 9296    | 9318   | 8548   | 9239   | 8792   | 9243   |

Table 2. Linear modeling analysis of Z-chromosome and dosage effects on gene expression levels across several tissues in *Heliconius* butterflies. Results reflect data filtering with a null expression likelihood of 0.5 and are representative of results using a range of likelihood thresholds (supplementary Table S3)

| Sample                 | Z-linkage only        |               | Z-linkage x sex interaction (Dosage effect) |                                  |               |
|------------------------|-----------------------|---------------|---------------------------------------------|----------------------------------|---------------|
|                        | Z-linkage Effect Size | ANOVA p-value | Z-linkage Effect Size                       | Interaction (Dosage) Effect Size | ANOVA p-value |
| Abdomen (H. cydno)     | -0.56                 | 2.16E-14      | -0.65878                                    | 0.212                            | 2.57E-05      |
| Head (H. cydno)        | -0.431                | 3.02E-08      | -0.40678                                    | 0.0642                           | 7.66E-08      |
| Abdomen (H. melpomene) | -0.385                | 1.53E-07      | -0.47591                                    | 0.189                            | 0.0001        |
| Head (H. melpomene)    | -0.263                | 0.00030       | -0.4581                                     | 0.289                            | 6.90E-27      |
| Antenna                | -0.371                | 2.35E-07      | -0.37173                                    | 0.0307                           | 0.224         |
| Leg                    | -0.275                | 0.00047       | -0.36309                                    | 0.169                            | 1.47E-14      |
| Mouth                  | -0.340                | 6.72E-06      | -0.36206                                    | 0.0615                           | 0.00227       |

Table 3. Summary of average Male:Female gene expression ratios for Z-linked and autosomal loci in *Heliconius* butterflies for several tissues. Results reflect data filtering with a null expression likelihood of 0.5 and are representative of results using a range of likelihood thresholds (supplementary Table S4).

| Tissue                          | No. Z-linked loci | No. Autosomal loci | Mean Z-linked log <sub>2</sub> (M:F) | Mean autosomal log <sub>2</sub> (M:F) | Median Z – linked log <sub>2</sub> (M:F) | Mean autosomal log <sub>2</sub> (M:F) | Z:A ratio of means (Not Log <sub>2</sub> ) | Z:A ratio of medians (Not Log <sub>2</sub> ) | MWU p-value: Autosomal ≠ Z-linked |
|---------------------------------|-------------------|--------------------|--------------------------------------|---------------------------------------|------------------------------------------|---------------------------------------|--------------------------------------------|----------------------------------------------|-----------------------------------|
| Abdomen ( <i>H. cydno</i> )     | 387               | 9539               | 0.3553                               | 0.1101                                | 0.1683                                   | -0.0009                               | 1.1853                                     | 1.1244                                       | <.0001                            |
| Head ( <i>H. cydno</i> )        | 425               | 9972               | 0.1173                               | 0.0584                                | 0.116                                    | 0.0543                                | 1.0417                                     | 1.0437                                       | 0.0034                            |
| Abdomen ( <i>H. melpomene</i> ) | 408               | 9859               | 0.2418                               | 0.0106                                | 0.1904                                   | -0.0788                               | 1.1738                                     | 1.2051                                       | <.0001                            |
| Head ( <i>H. melpomene</i> )    | 433               | 9909               | 0.0847                               | -0.1372                               | 0.1002                                   | -0.0904                               | 1.1662                                     | 1.1412                                       | <.0001                            |
| Antenna                         | 378               | 8957               | 0.0115                               | -0.039                                | 0.0731                                   | -0.009                                | 1.0356                                     | 1.0586                                       | 0.021                             |
| Leg                             | 354               | 8457               | 0.1272                               | -0.0912                               | 0.1731                                   | -0.097                                | 1.1634                                     | 1.2059                                       | <.0001                            |
| Mouth                           | 356               | 8636               | 0.003                                | -0.0741                               | 0.0811                                   | -0.0561                               | 1.0549                                     | 1.0997                                       | <.0001                            |

Table 4. Counts of sex-biased and unbiased genes (FDR < 0.05 and a minimum fold-change of 1.5) on the Z chromosome and autosomes (A) in several tissues of *Heliconius* butterflies.

| Expression Category | Abdomen (H. cydno) |      | Head (H. cydno) |      | Abdomen (H. melpomene) |      | Head (H. melpomene) |      | Antenna |      | Leg |      | Mouth |      |
|---------------------|--------------------|------|-----------------|------|------------------------|------|---------------------|------|---------|------|-----|------|-------|------|
|                     | Z                  | A    | Z               | A    | Z                      | A    | Z                   | A    | Z       | A    | Z   | A    | Z     | A    |
| Male bias           | 114                | 1470 | 3               | 7    | 130                    | 1590 | 0                   | 0    | 0       | 0    | 0   | 0    | 0     | 0    |
| Unbiased            | 275                | 7008 | 385             | 9389 | 290                    | 6888 | 394                 | 9354 | 319     | 8167 | 301 | 7717 | 295   | 7715 |
| Female bias         | 48                 | 1540 | 0               | 8    | 58                     | 2025 | 0                   | 3    | 0       | 3    | 0   | 0    | 0     | 0    |

Table 5. Summary of observed patterns of sex chromosome dosage compensation in the Lepidoptera.

| Phylogeny                                                                                                                                                       | Taxon                       | Male Z:A ratio | Female Z:A ratio | Z Dosage effect<br>(average M:F expression on Z) |
|-----------------------------------------------------------------------------------------------------------------------------------------------------------------|-----------------------------|----------------|------------------|--------------------------------------------------|
| 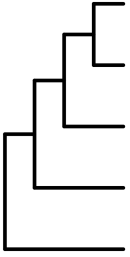                                                                               | <i>Bombyx</i> <sup>1</sup>  | < 1            | < 1              | None (M = F)                                     |
|                                                                                                                                                                 | <i>Manduca</i> <sup>2</sup> | < 1            | < 1              | None (M = F)                                     |
|                                                                                                                                                                 | <i>Plodia</i> <sup>3</sup>  | = 1            | << 1             | Strong male bias (M >> F)*                       |
|                                                                                                                                                                 | <i>Heliconius</i>           | < 1            | < 1              | Weak male bias (M ≥ F)                           |
|                                                                                                                                                                 | Basal ZO<br>Lepidoptera     | ?              | ?                | ?                                                |
| 1) Walters and Hardcastle (2011)<br>2) Smith et al. (2014)<br>3) Harrison et al. (2012)<br>*not directly reported, but assumed based on sex-specific Z:A ratios |                             |                |                  |                                                  |



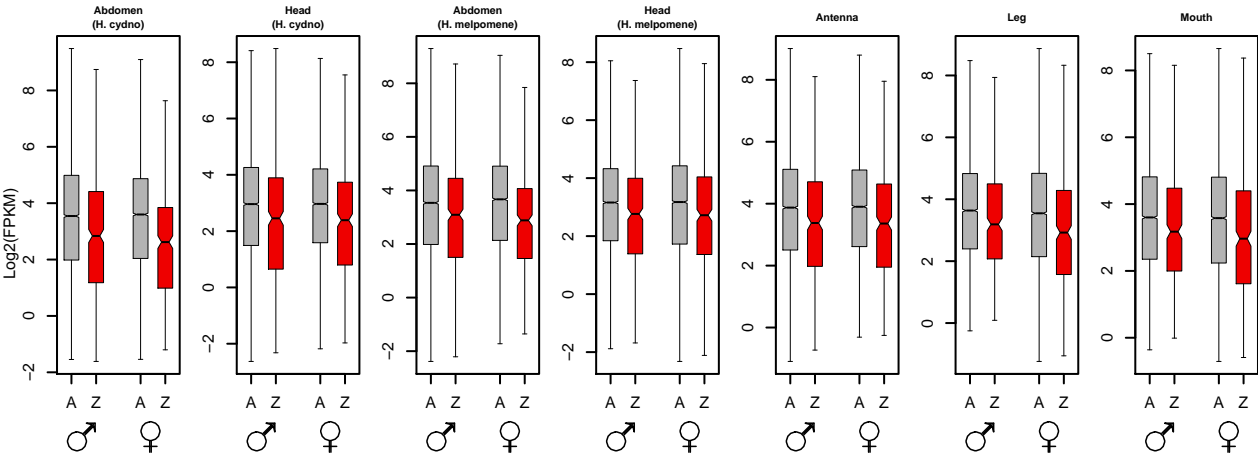

Log2(Male/Female)

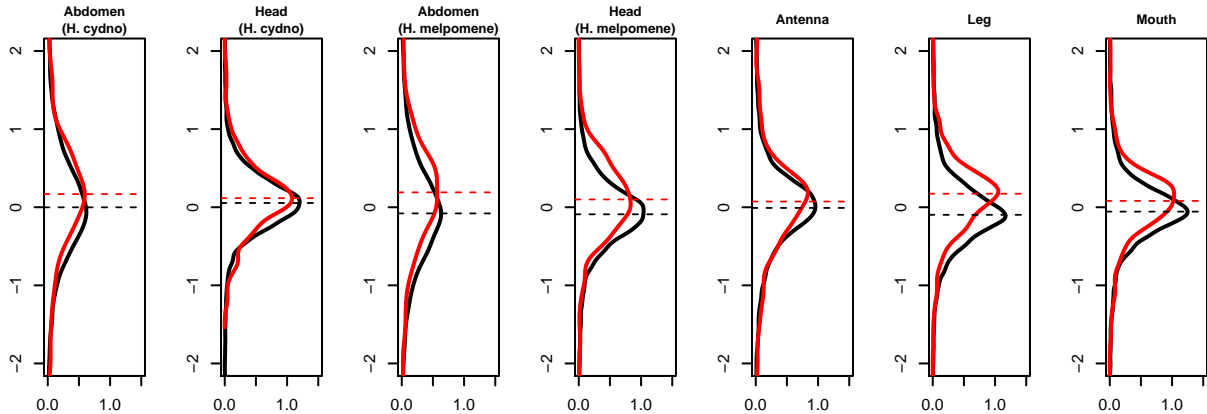

Distribution Density

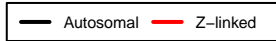

## Abdomen

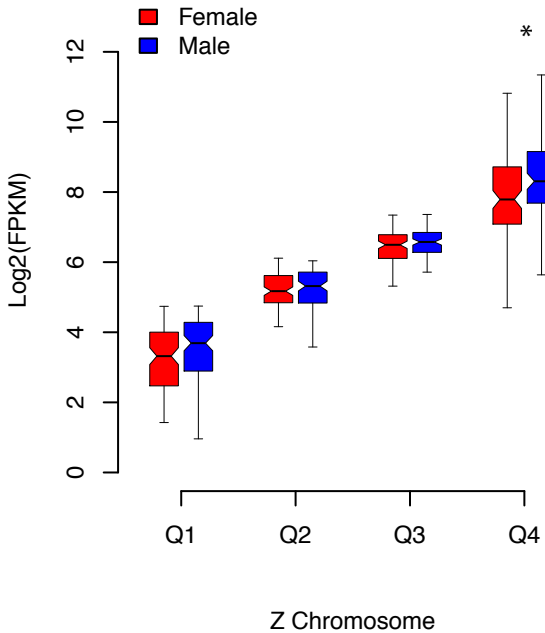

## Head

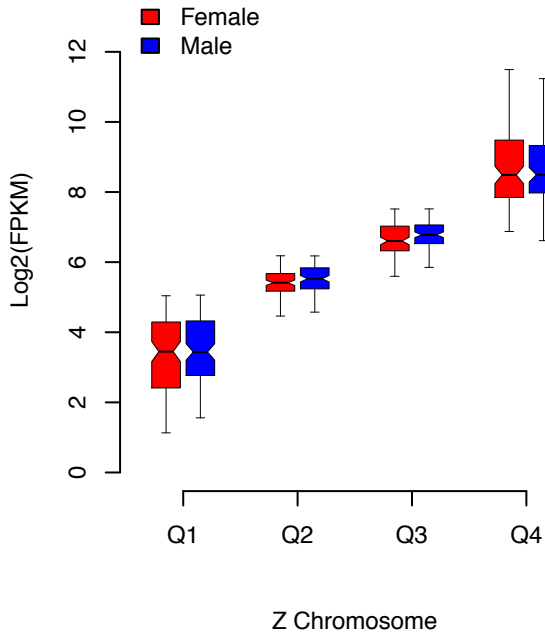

**H. cydno**  
**Abdomen**

**H. melpomene**  
**Abdomen**

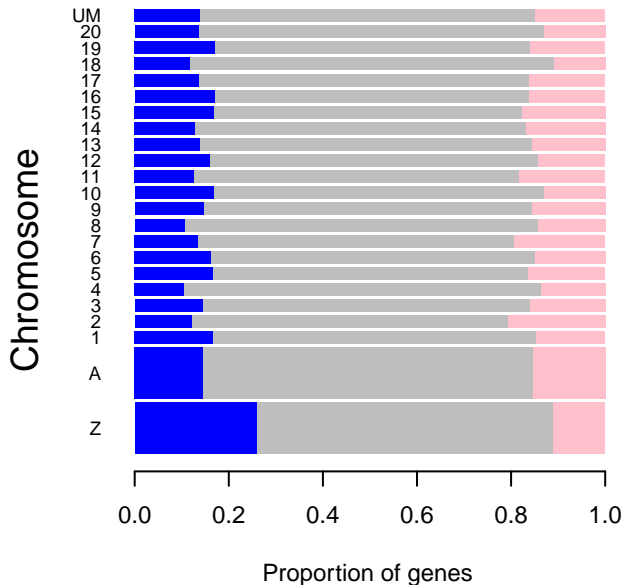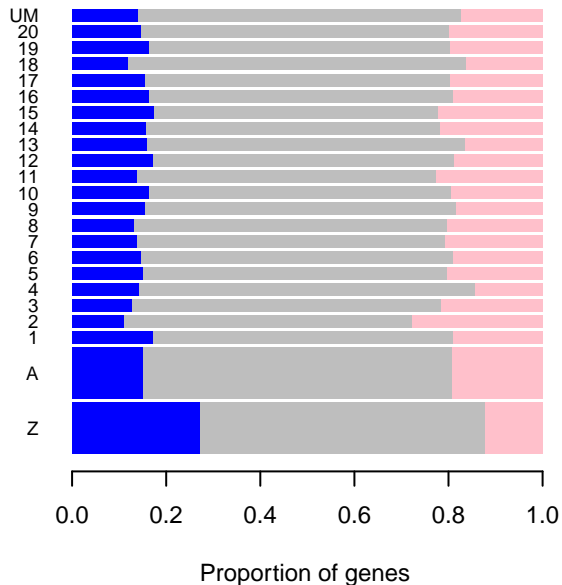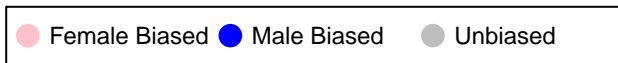

Figure S1. Distributions of log<sub>2</sub>-transformed gene expression levels (FPKM) for each chromosome in male and female *Heliconius* butterflies. The right-hand most box reflects genes not mapped to chromosome. The horizontal redline indicates the median log<sub>2</sub>(FPKM) of the Z chromosome. Boxes indicate the interquartile range (IQR) around the median (black bar) and whiskers extend to 1.5 times the IQR; outlier points beyond 1.5 IQR are not plotted. Data were filtered with a null expression likelihood of 0.5

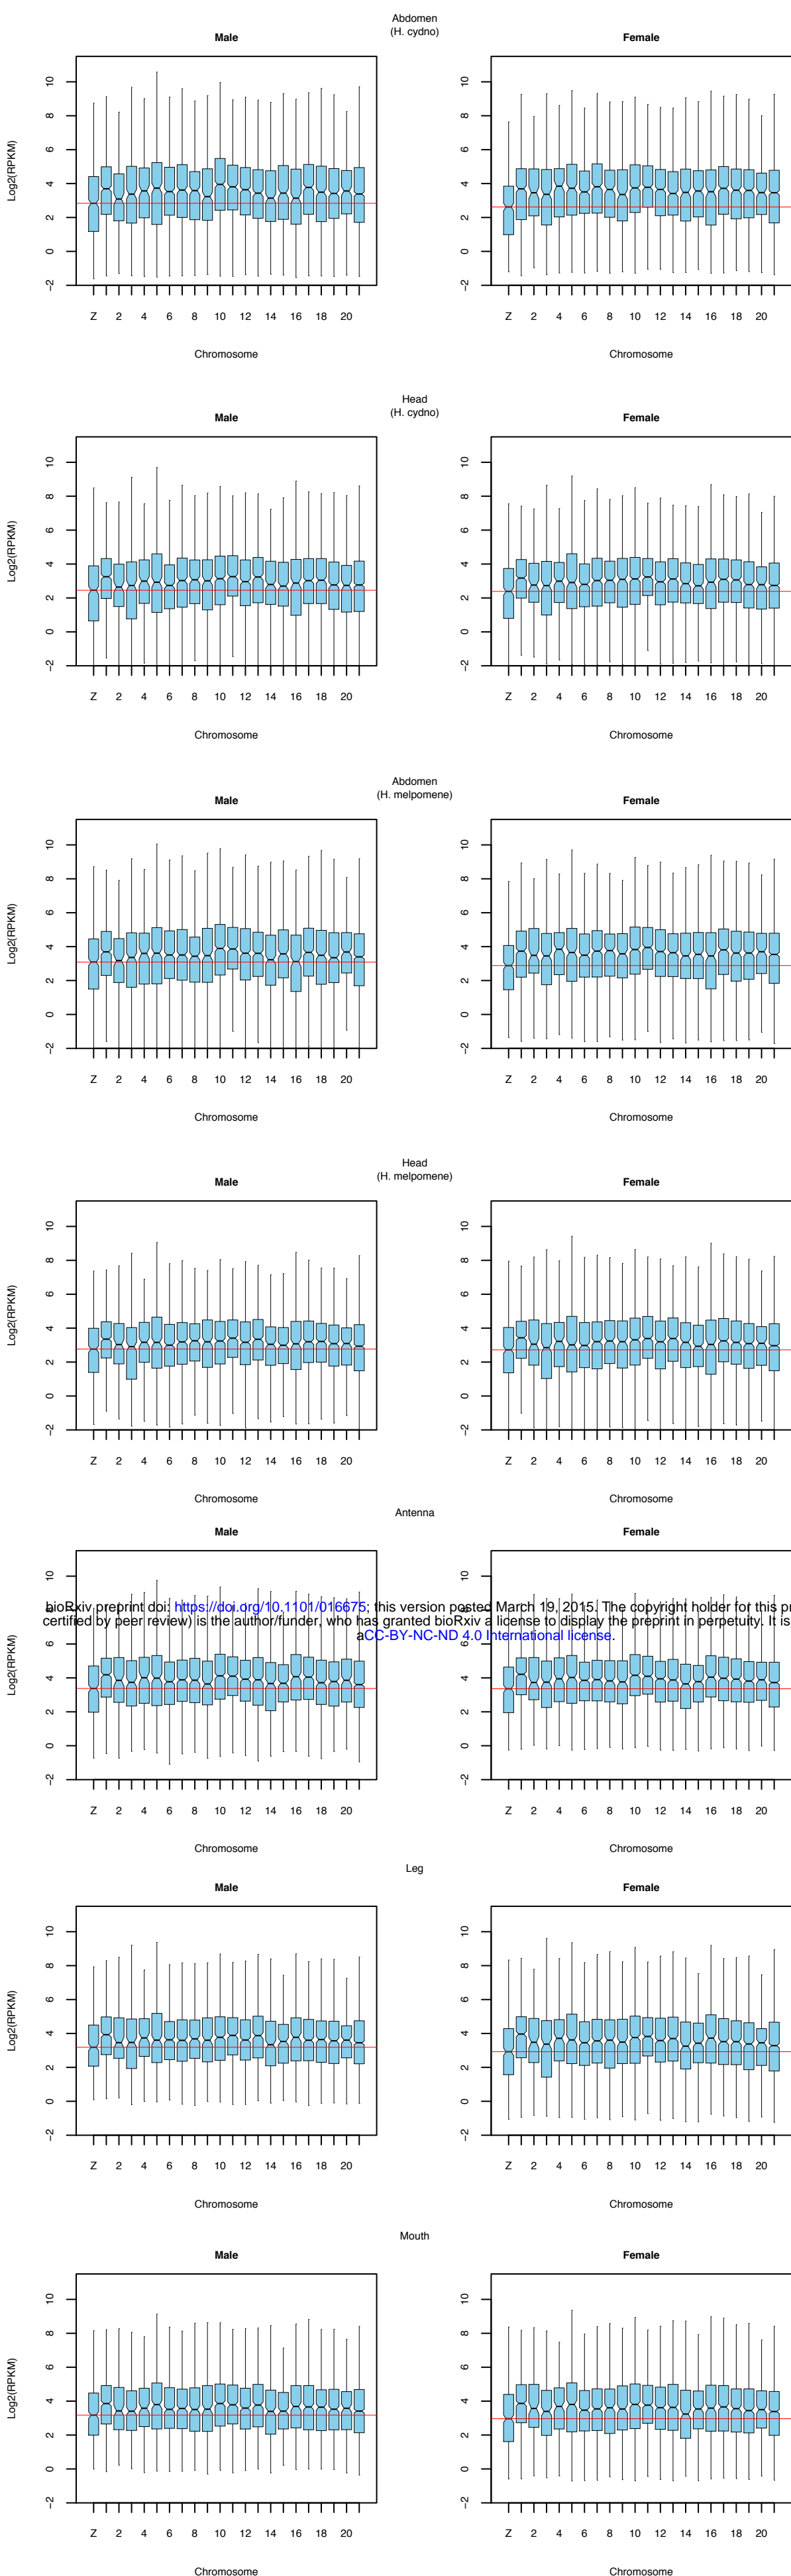

Quartile comparisons between sexes of Z-chromosome expression

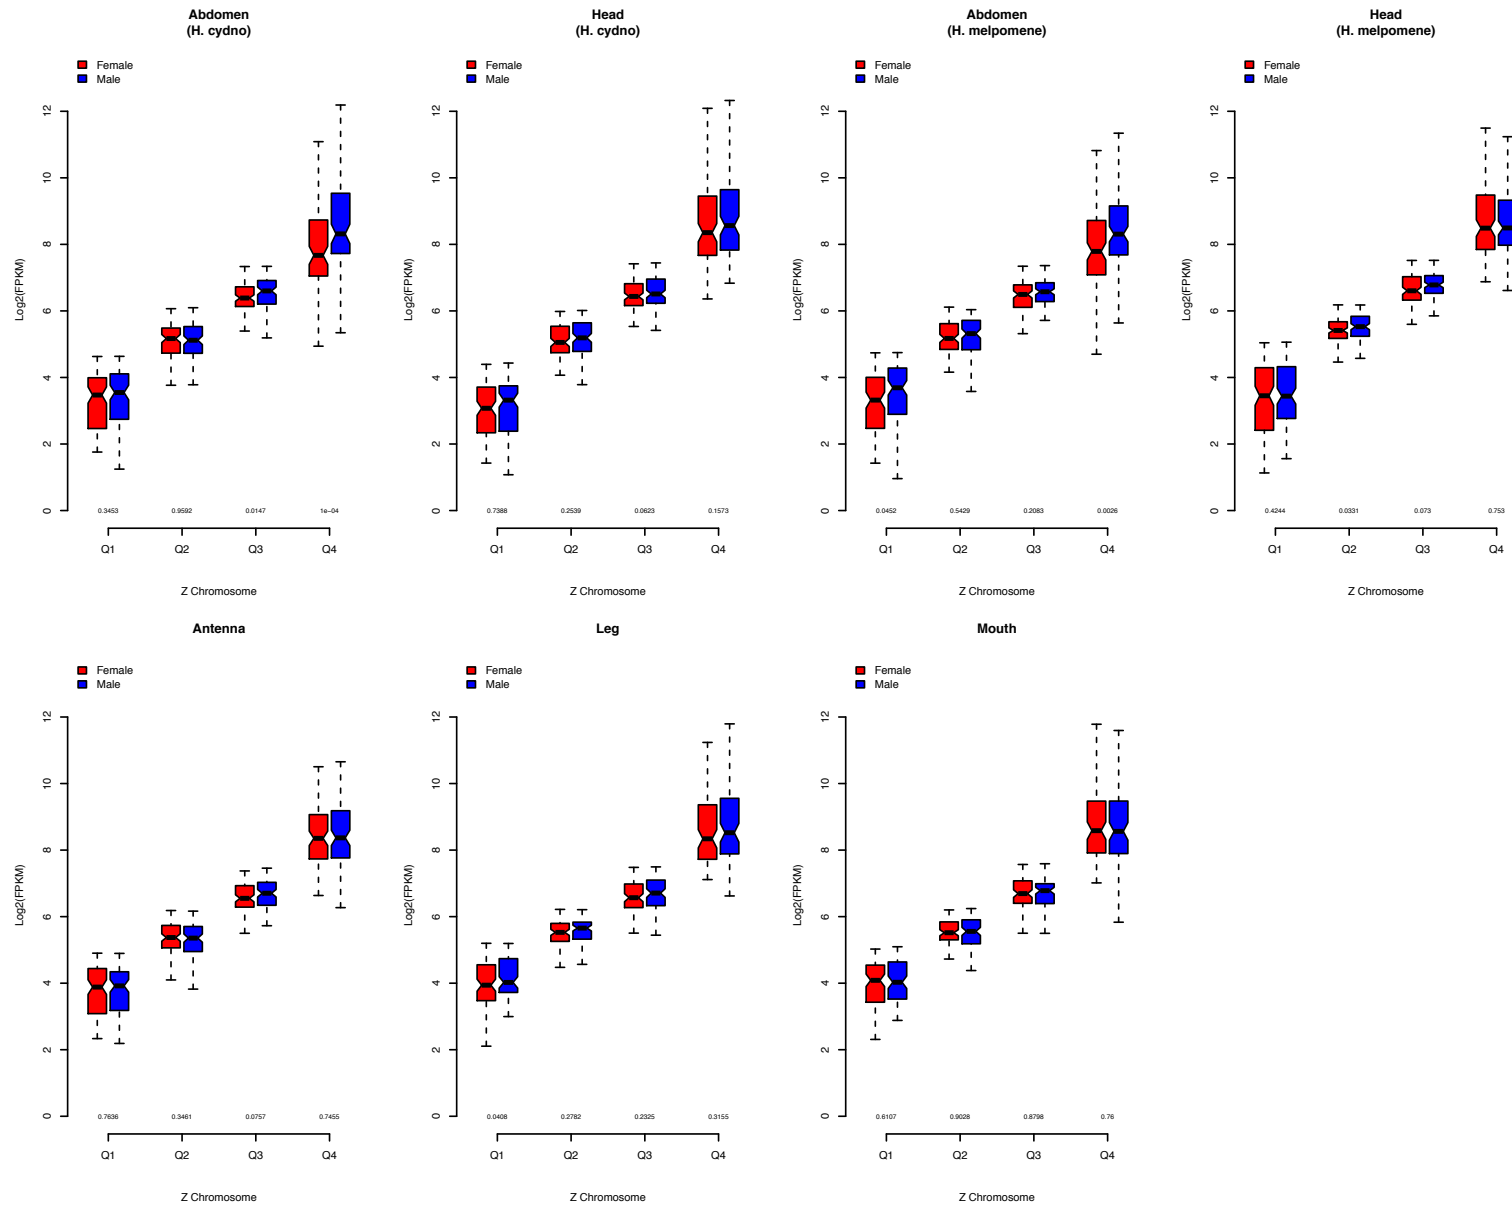

Figure S2. Comparison of male (blue) and female (red) expression levels for Z-linked loci, divided into quartiles based on the maximum of male or female expression in various tissues from *Heliconius* butterflies. Boxes indicate the interquartile range (IQR) around the median (black bar) and whiskers extend to 1.5 times the IQR. P-values of a Mann-Whitney U test of inequality between males and females are printed for each quartile along the x-axis

H. cydno

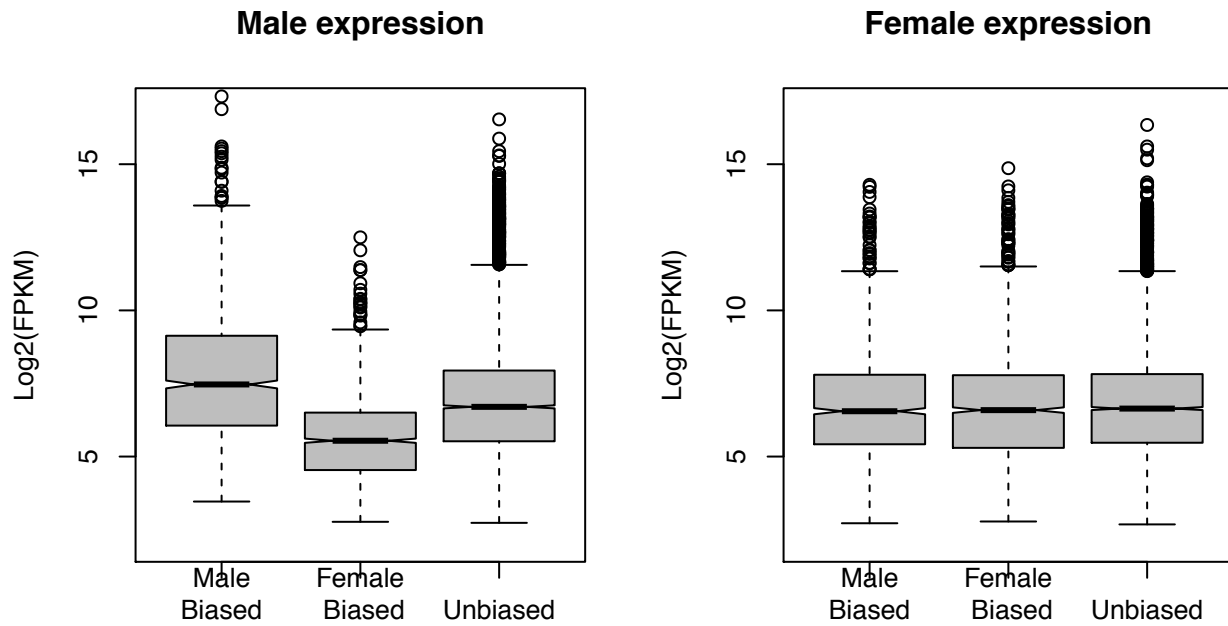

H. melpomene

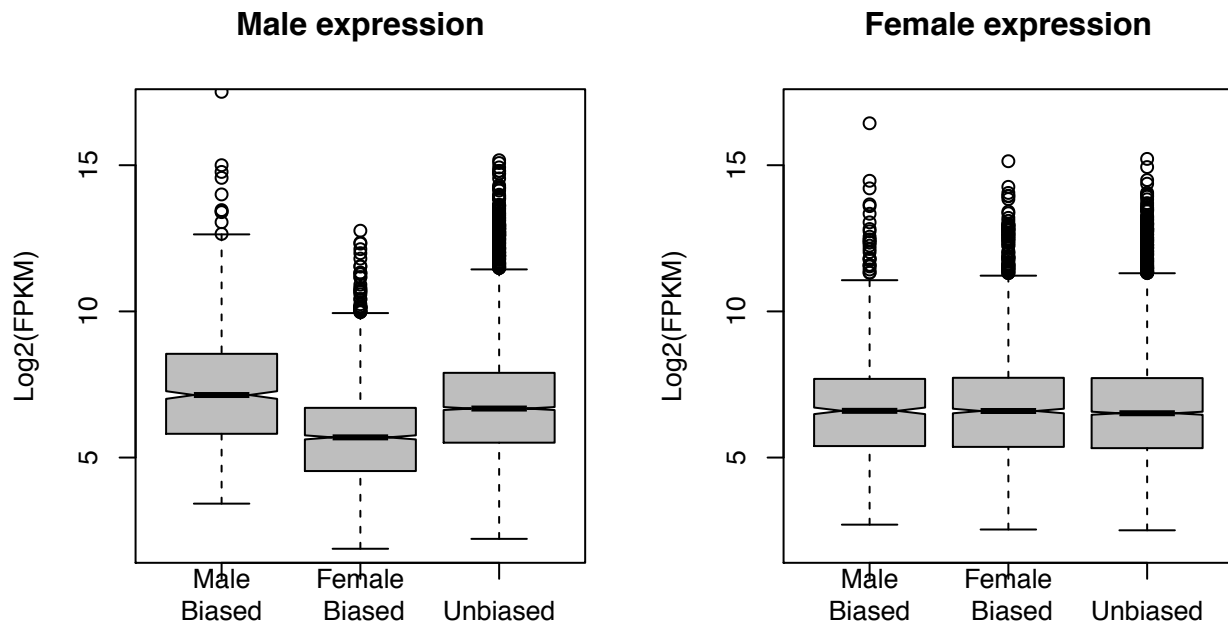

Figure S3. Distributions of log<sub>2</sub>-transformed gene expression levels (FPKM) for expressed autosomal loci, partitioned by category of sex-biased expression, in abdomens from two species of *Heliconius* butterflies. In both species males, but not females, showed significantly different levels of expression across categories (Kruskal-Wallis test,  $p < 0.001$ ). A gene was considered sex-biased if significantly differentially expressed between males and females with FDR < 0.05 and a minimum fold-change of 1.5. Boxes indicate the interquartile range (IQR) around the median (black bar) and whiskers extend to 1.5 times the IQR. Data were filtered with a null expression likelihood of 0.5.
